1 **Bacterial contamination of Healthcare workers' mobile phones in**  
2 **Africa: a systematic review and meta-analysis**

3 Demisu Zenbaba<sup>1\*</sup>, Biniyam Sahiledengle<sup>1</sup>, Girma Beressa<sup>1</sup>, Fikreab  
4 Desta<sup>1</sup>, Zinash Teferu<sup>1</sup>, Fikadu Nugusu<sup>1</sup>, Daniel Atlaw<sup>2</sup>, Zerihun Shiferaw<sup>2</sup>,  
5 Ayele Mamo<sup>3</sup>, Wogane Negash<sup>4</sup>, Getahun Negash<sup>5</sup>, Mohammedaman  
6 Mama<sup>5</sup>, Eshetu Nigussie<sup>5</sup>, Vijay Kumar Chattu<sup>6, 7, 8</sup>

7 <sup>1</sup>Department of Public Health, School of Health Sciences, Madda Walabu University,  
8 P.O.Box 302, Goba, Ethiopia

9 <sup>2</sup> Anatomy Unit, School of Medicine, Madda Walabu University, P.O.Box 302, Goba,  
10 Ethiopia

11 <sup>3</sup>Department of Pharmacy, School of Medicine, Madda Walabu University, P.O.Box 302,  
12 Goba, Ethiopia

13 <sup>4</sup>Department of Nursing, School of Health Sciences, Madda Walabu University, P.O.Box  
14 302, Goba, Ethiopia

15 <sup>5</sup> Department of Medical Laboratory, School of Health Sciences, Madda Walabu  
16 University, P.O.Box 302, Goba, Ethiopia

17 <sup>6</sup>Center for Trans disciplinary Research, Saveetha Institute of Medical and Technical  
18 Sciences, Saveetha University, Chennai 600077, India

19 <sup>7</sup>Department of Community Medicine, Faculty of Medicine, Datta Meghe Institute of  
20 Medical Sciences, Wardha 442107, India

21 <sup>8</sup>School of Public Health, University of Alberta, Edmonton, AB T6G 1C9, Canada

22 **\*Corresponding author**

23 **Email: [zdemisu@gmail.com](mailto:zdemisu@gmail.com) (DZ)**

24

25

26 **Abstract**

27 **Background:** Mobile phones are potential reservoirs for pathogens and sources of  
28 healthcare-associated illnesses. More microbes can be found on a mobile phone than on  
29 a man's lavatory seat, the sole of a shoe, or a door handle. When examining patients,  
30 frequent handling of mobile phones can spread bacteria and provide a suitable breeding  
31 environment for numerous microorganisms. Nevertheless, evidence of bacterial  
32 contamination of mobile phones among healthcare workers in Africa was not conclusive.  
33 Thus, this meta-analysis and systematic review was conducted to estimate the pooled  
34 prevalence of bacterial contamination of mobile phones used by healthcare workers and  
35 the most frequent bacterial isolates in Africa.

36 **Methods:** We systematically retrieved relevant studies using PubMed/MEDLINE,  
37 Scopus, POPLINE, HINARI, Science Direct, Cochrane Library databases, and Google  
38 Scholar from 2009 to 2021 publication year. We included observational studies that  
39 reported the prevalence of bacterial contamination of mobile phones among healthcare  
40 workers. Two independent authors assessed the quality of the studies. The  
41 DerSimonian-random Laird's effect model was used to calculate effect estimates for the  
42 pooled prevalence of bacterial contamination in mobile phones, as well as a 95%  
43 confidence interval (CI).

44 **Results:** Among 3882 retrieved studies, 23 eligible articles with a total sample size of  
45 2,623 study participants were included in the meta-analysis. The pooled prevalence of  
46 mobile phones bacterial contamination among healthcare workers was 83.9% (95% CI:  
47 80.6, 87.2%;  $I^2 = 98\%$ ,  $p\text{-value} < 0.001$ ). The most dominant type of bacteria isolated in  
48 this review was *coagulase-negative staphylococci* (CONS) which accounted for 44.5% of  
49 the pooled contamination rate of mobile phones used by healthcare workers, followed by  
50 *Staphylococcus aureus* (32.3%), and *Escherichia coli* (8.4%).

51 **Conclusion:** The review indicated that the contamination with a different bacterial isolate  
52 of mobile phones used by health care workers was high. The most dominant bacterial  
53 isolates were *Coagulase-negative staphylococci*, *Staphylococcus aureus*, and  
54 *Escherichia coli*. Hence, these findings would have implications for policymakers and  
55 resource allocation for preventive measures initiatives.

56 **Keywords:** Bacteria, Contamination, Healthcare workers, Mobile Phone, Africa

## 57 Introduction

58 Currently, mobile phones have become essential accessories for healthcare workers and  
59 social life [1, 2]. Mobile phones have become an important part of the healthcare delivery  
60 system because they improve the quality of care and communication [1, 3]. It also makes  
61 interdepartmental communication easier, allowing for faster interactions within healthcare  
62 institutions and more efficient access to information for patient care [4, 5]. Despite all of  
63 the potential benefits, mobile phones play a critical role in becoming potential germ  
64 reservoirs and are known to induce healthcare-associated diseases [6-9].

65 A variety of bacteria, including skin flora and pathogenic bacteria, have been identified  
66 on the surface of mobile phones [10, 11]. In HICs, bacterial infections on healthcare  
67 personnel's mobile phones range from 75 to 96% [12-19]. *Coagulase-negative*  
68 *staphylococci (CoNS)* and *Micrococcus* were the most commonly recovered bacteria,  
69 followed by *methicillin-sensitive and methicillin-resistant Staphylococcus aureus (MRSA)*,  
70 *Acinetobacter*, and *Pseudomonas species* [12-19]. In low-and middle-income countries'  
71 healthcare settings, bacterial contamination rates of mobile phones used by healthcare  
72 personnel ranged from 42% to 100%. The most prevalent bacteria isolated were  
73 *coagulase-negative staphylococci*, *Escherichia coli*, *Acinetobacter species*,  
74 *Pseudomonas species*, and *MRSA* bacteria [20-26]. Several infectious illnesses,  
75 including diarrhea, food poisoning, and wound infections, are caused by these bacteria  
76 [3, 27, 28].

77 The global burden of healthcare-associated infections (HAIs) is increasing, resulting in  
78 increased morbidity and death among patients and significant challenges for the  
79 healthcare system [7, 29, 30]. The cumulative incidence of HAIs ranges from 5.7 to  
80 48.5% within African countries [31]. Contamination of inanimate gadgets used by  
81 healthcare professionals, such as cell phones, is one of the many sources of healthcare-  
82 acquired infections [30, 32]. More bacteria can be found on a mobile phone than on a  
83 man's lavatory seat, the sole of a shoe, or a door handle [31, 33, 34]. Drug-resistant  
84 organisms such as *MRSA* and *vancomycin-resistant enterococci (VRE)* have also been  
85 found in hospital settings using mobile phones. The drug-resistant bacterium that can

86 cause HAIs and is a public health issue was found to be responsible for 40% to 70% of  
87 the contamination of healthcare professionals' mobile phones [14, 33].

88 When examining patients, frequent handling of mobile phones can spread bacteria and  
89 provide a suitable breeding environment for numerous microorganisms [10, 35, 36].  
90 Although there has been some small-scale research on the bacterial contamination of  
91 mobile phones among healthcare workers, a comprehensive review and meta-analysis  
92 have not been conducted for Africa. Therefore, this systematic review and meta-analysis  
93 aimed to estimate the pooled prevalence of bacterial contamination of mobile phones  
94 used by healthcare workers and the most common bacterial isolates in Africa. Besides,  
95 we anticipated descriptively summarizing bacterial isolates' antimicrobial susceptibility  
96 and multidrug resistance patterns.

## 97 **Methods**

### 98 **Registration and protocol**

99 This systematic review and meta-analysis (SRMA) was conducted to estimate the pooled  
100 prevalence of bacterial contamination of mobile phones among HCWs in Africa. To  
101 ensure the usefulness of this SRMA to the readers, we developed a transparent,  
102 complete, and accurate report of the purpose of this review, using the Preferred  
103 Reporting Items for Systematic Reviews and Meta-Analysis (PRISMA) criteria (Additional  
104 file 1 Table). This systematic review was carried out following the Joanna Briggs  
105 Institute (JBI) methodology for systematic reviews of a proportion of evidence [37]. The  
106 systematic review and meta-analysis were prospectively registered in PROSPERO  
107 (record ID: CRD42022306250, February 22, 2022).

### 108 **Search strategy**

109 We systematically retrieved relevant studies using PubMed/MEDLINE, Scopus,  
110 POPLINE, HINARI, Science Direct, Cochrane Library databases, and Google Scholar  
111 from inception to March 25, 2022. All the databases were comprehensively searched to  
112 find potentially relevant papers published and unpublished between 2009 and 2021. All  
113 searches were limited to English-language papers. In addition to the electronic database  
114 search, Google was used to look for grey literature. We also looked for related studies in  
115 the reference lists of included studies. For the PubMed/MEDLINE search, the following

116 phrases and keywords were used:[“Bacterial Contamination” OR “microbial  
117 contamination” OR “Contamination, equipment” AND "Cell Phones" OR "Mobile Phone"  
118 OR "Mobile Phones" OR "Smart Phones" OR "cellular Phones" AND Health Personnel”  
119 OR “HealthCare Providers” OR “Health Care Provider” OR “Provider, Health Care” OR  
120 “Healthcare Providers” OR “Healthcare Provider” OR “Provider, Healthcare” OR  
121 “Healthcare Workers” OR “Healthcare Worker” OR “Health Care Professionals” OR  
122 “Health Care Professional” OR “Professional, Health Care” AND Africa). We used  
123 database-specific subject headings linked with the above terms and keywords used in  
124 PubMed for the other electronic databases (Additional file 2).

## 125 **Eligibility criteria**

### 126 **Inclusion Criteria**

127 The review process included all studies that met the following criteria: (1) studies that  
128 reported the magnitude of bacterial contamination from healthcare workers' mobile  
129 phones surfaces, (2) studies published in English but conducted only in Africa at any  
130 given time, and (3) studies conducted using standard bacteriological techniques (i.e.,  
131 swab method or settle plate sampling method) [32, 38, 39]. (4) Studies that accurately  
132 reported the swab culture growth rate for bacterial isolates, (5) all relevant free-of-charge  
133 full-text original research articles, and (6) all observational study designs, including  
134 published and unpublished studies, were all taken into account.

### 135 **Exclusion Criteria**

136 The study was excluded for the following reasons: inaccessible or irretrievable full-text  
137 articles after contacting the corresponding authors via email at least two times; reviews,  
138 commentaries, letters to the editor, conference proceedings, and abstracts; studies with  
139 unclear methods; reports from inanimate objects other than mobile phones (such as  
140 Stethoscopes, BP apparatus, and patient beds); studies conducted on non-healthcare  
141 workers; and studies that did not report the outcome of interest.

### 142 **Assessment of outcome variables**

143 The primary outcome variable was the prevalence of bacterial contamination of mobile  
144 phones used by healthcare workers, as defined by the included studies' operational  
145 definition. The prevalence of mobile phone bacterial contamination was calculated by  
146 dividing the total number of swabs collected from the mobile phones of healthcare  
147 professionals by the total number of swabs taken from mobile phones of healthcare  
148 workers and multiplying by 100. The second objective of this study was to descriptively  
149 characterize the most common types of bacteria isolated from healthcare workers'  
150 mobile phones and their drug sensitivity and resistance patterns, utilizing studies that  
151 were included.

## 152 **Operational definitions**

153 **Non-selective bacteria isolation method:** Culture mediums such as blood agar and  
154 nutrient agar can grow a wide variety of bacteria [39].

155 **Selective bacteria isolation method:** A culture medium such as MacConkey agar is  
156 more selective to isolate 'bile tolerant' bacteria found in the large intestine [39].

## 157 **Study selection and data extraction**

158 All the retrieved citations were imported into EndNote version X8 and duplicates were  
159 removed. The JBI data extraction format was used to extract the data [40]. Based on the  
160 established inclusion criteria, two authors (DZ and BS) independently assessed and  
161 identified papers by their titles, abstracts, and full texts. Any disagreements that arose  
162 were resolved by consensus or with the additional author/s (DZ and GB). The data  
163 extraction format included the primary author, publication year, country, study area,  
164 bacteria isolation method, optimum temperature, incubation period, the most prevalent  
165 types of bacteria isolated, isolated bacteria drug sensitivity, isolated bacteria drug  
166 resistance, sample size, and prevalence of mobile phone bacterial contamination.

## 167 **Assessment of risk of bias**

168 The quality of the appended studies was assessed using the JBI meta-analysis of  
169 statistics assessment and review instrument (MAStARI) quality rating tool [40, 41]. An  
170 appropriate sampling frame, proper sampling technique, study subject and setting  
171 description, sufficient data analysis, use of valid methods for the identified conditions, a  
172 valid measurement for all participants, using appropriate statistical analysis, in a valid  
173 and reliable outcome measure, with a 50% or higher overall score considered low risk of

174 bias, are among the JBI parameters. As a result, bias risks were classified as low (total  
175 score of 2), moderate (total score of 3-4), or high (total score of > 5) [41]. Two  
176 independent authors rated the quality of the included studies (DZ and BS). Any  
177 disagreements that arose were addressed through consensus. Finally, papers with a  
178 score of 5 or higher were ruled out as having a significant risk of bias (Additional file 3).

## 179 **Data synthesis**

180 Before being evaluated, the data was extracted into a Microsoft Excel file. The data were  
181 analyzed using STATA software version 16. The standard errors of the included studies  
182 were determined using the formula ( $SE = p(1-p)/n$ ). To investigate heterogeneity in the  
183 stated proportion, the  $I^2$  statistics and p-values of the Cochrane Q-test were utilized. The  
184 Cochrane Q-test p-values are less than 0.1 and are deemed to indicate the presence of  
185 heterogeneity among studies. To assess the percentage of total variance owing to  
186 heterogeneity across trials, we used the Higgins  $I^2$  test statistics [41]. Although no  
187 specific criterion exists for when heterogeneity becomes substantial, some researchers  
188 suggest low heterogeneity when  $I^2$  values are between (25–50%), moderate (50–75%),  
189 and high (> 75%) [41]. Because the test statistic revealed significant heterogeneity  
190 among the research ( $I^2 = 98\%$ , p-value 0.001), the DerSimonian-influence Laird's was  
191 analyzed using a random-effects model. The effect sizes were calculated as a  
192 percentage with a 95% confidence interval (CI). There was a lot of variation in the  
193 included studies in this review according to the  $I^2$  category. We used subgroup analysis  
194 by sub-region, study area, bacteria isolation method, sample size, and publication year  
195 to find the source of variation. The meta-analysis findings were displayed using a forest  
196 plot. A funnel plot was employed in conjunction with meta-regression to assess  
197 publication bias. The plot resembles an asymmetrical, huge, inverted funnel in the  
198 absence of publication bias. Egger's weighted regression and Begg's rank correlation  
199 tests (p-value < 0.05) were used to objectively assess publication bias; however, only  
200 Egger's test was shown to be statistically significant (p-value = 0.001). To test the  
201 findings' robustness, a leave-one-out sensitivity meta-analysis was used.

## 202 **Results**

203 A total of 3,882 articles were identified after a thorough search of the literature. Of these  
204 articles, 2,951 duplicates were removed, and 931 were screened only based on their

205 titles and abstracts. Following the exclusion of 844 articles, a total of 87 full-text papers  
 206 were verified for eligibility using the pre-determined criteria, with 64 articles being  
 207 excluded. Finally, 23 articles [21-25, 42-59] that satisfied the criteria were included in the  
 208 meta-analysis (Fig. 1).

### 209 Descriptions of the included studies

210 All included studies were cross-sectional by design and were published between 2009  
 211 and 2021. The current meta-analysis used 2,623 mobile phones from healthcare  
 212 professionals to estimate the pooled proportion of bacterial contamination. In terms of  
 213 sub-regional distribution, nine studies were from Eastern Africa [22, 24, 25, 42, 44-46,  
 214 58], four studies from Western [21, 51, 52, 55], seven studies from Northern [23, 47-50,  
 215 54, 57], one study from Southern [56], and two studies from middle African countries [53,  
 216 59] (Table 1).

217 **Table 1: Descriptive summary of 23 studies included in the meta-analysis to**  
 218 **estimate pooled prevalence of HCWs bacterial contamination of mobile phones in**  
 219 **Africa.**

| Study ID | Authors (year)                   | Country  | Healthcare facility  | Bacterial isolation method                            | Temperature for growth in C° | Incubation time in hours | Sample size | Overall mobile phones bacteria contamination rate with 95%CI |
|----------|----------------------------------|----------|----------------------|-------------------------------------------------------|------------------------------|--------------------------|-------------|--------------------------------------------------------------|
| 1        | Asfaw <i>et al.</i> , 2021 [22]  | Ethiopia | Referral Hospital    | MacConkey agar                                        | 35-37                        | 24                       | 65          | 99.9 (99.3,100.67)                                           |
| 2        | Gashaw <i>et al.</i> , 2014[45]  | Ethiopia | Health center        | MacConkey agar, chocolate agar, and blood agar plates | 37                           | 24-48                    | 57          | 98.3(94.9, 101.66)                                           |
| 3        | Daka 2014[42]                    | Ethiopia | Referral Hospital    | Blood agar                                            | 37                           | 18-24                    | 100         | 62 (52.5, 71.5)                                              |
| 4        | Ayalew <i>et al.</i> , 2019[43]  | Ethiopia | Referral Hospital    | Blood agar                                            | 37                           | 18-24                    | 422         | 59.4(54.7, 64.1)                                             |
| 5        | Misgana <i>et al.</i> , 2014[44] | Ethiopia | specialized Hospital | Blood agar                                            | 37                           | 24-48                    | 66          | 86.4(78.1, 94.7)                                             |
| 6        | Bodena <i>et al.</i> , 2019[46]  | Ethiopia | specialized Hospital | MacConkey Agar                                        | 37                           | 18-24                    | 226         | 94.2(91.2, 97.3)                                             |
| 7        | Araya <i>et al.</i> 2021[24]     | Ethiopia | specialized Hospital | MacConkey and Blood agar                              | 37                           | 24-48                    | 572         | 79.4(76.1, 82.7)                                             |
| 8        | Mohamedin <i>et</i>              | Egypt    | Internation          | MacConkey                                             | 37                           | 24-48                    | 150         | 79.3(72.8, 85.8)                                             |



|    |                                     |              |                              |                                                           |    |       |     |                   |
|----|-------------------------------------|--------------|------------------------------|-----------------------------------------------------------|----|-------|-----|-------------------|
|    | <i>al.</i> 2019[47]                 |              | al Hospital                  | and Blood agar                                            |    |       |     |                   |
| 9  | Elgabeery 2021[48]                  | Egypt        | University Hospital          | MacConkey's agar, nutrient agar, blood agar               | 37 | 24    | 160 | 84.4(78.8, 90.0)  |
| 10 | Selim <i>et al.</i> ,2015[49]       | Egypt        | University Hospital          | MacConkey's and Blood agar plates.                        | 37 | 24    | 40  | 99.9(98.9, 100.9) |
| 11 | Shahaby <i>et al.</i> ,2012[50]     | Egypt        | University clinic            | MacConkey agar plates                                     | 37 | 48    | 8   | 10.3(-10.8, 31.4) |
| 12 | Mohamadou <i>et al.</i> 2021[53]    | Cameroon     | different levels of Hospital | Blood, Chocolate, and Mannitol Salt agar                  | 37 | 24-48 | 156 | 95.7(92.5, 98.9)  |
| 13 | Christelle <i>et al.</i> , 2019[59] | DR Congo     | General Hospital             | MacConkey Agar                                            | NR | NR    | 54  | 99.9(99.1, 100.7) |
| 14 | Yar <i>et al.</i> 2021[51]          | Gana         | Hospital                     | Blood and MacConkey Agar                                  | 37 | 24hr  | 35  | 99.9(98.9, 100.9) |
| 15 | Fandoh 2018[52]                     | Gana         | Hospital                     | RODAC plate                                               | NR | NR    | 39  | 97.5(97.5, 102.4) |
| 16 | Daoudi <i>et al.</i> ,2017[54]      | Morocco      | University Hospital          | Blood agar                                                | 37 | 72    | 17  | 99.9(98.4, 101.4) |
| 17 | Nwankwo <i>et al.</i> , 2014[21]    | Nigeria      | Hospital                     | MacConkey and blood agar plates.                          | 37 | 18-24 | 56  | 94.6(88.7, 100.5) |
| 18 | Akinyemi <i>et al.</i> ,2009[55]    | Nigeria      | University Hospital          | blood agar and eosin methylene blue agar plates           | 37 | 24    | 38  | 15.3(3.9, 26.8)   |
| 19 | Bobat <i>et al.</i> ,2016[56]       | South Africa | University Hospital          | Colistin, nalidixic acid agar, and MacConkey agar plates. | 37 | 18-24 | 100 | 3021.0, 39.0)     |
| 20 | Haghamad. 2021[23]                  | Sudan        | University Hospital          | Blood agar and MacConkey agar                             | 37 | 18-24 | 100 | 87(80.4, 93.6)    |
| 21 | Osman <i>et al.</i> ,2018[57]       | Sudan        | Hospital                     | blood agar, MacConkey agar, and chocolate agar            | 37 | 24    | 57  | 95(89.3, 100.7)   |
| 22 | Tusabe <i>et al.</i> 2021[58]       | Uganda       | Referral Hospital            | MacConkey agar plates                                     | 37 | 24    | 13  | 93(79.1, 106.9)   |

|    |                                  |        |                     |                                      |       |       |    |                |
|----|----------------------------------|--------|---------------------|--------------------------------------|-------|-------|----|----------------|
| 23 | Mushabati <i>et al.</i> 2021[25] | Zambia | University Hospital | MacConkey, chocolate, and blood agar | 35-37 | 18-24 | 92 | 79(70.7, 87.3) |
|----|----------------------------------|--------|---------------------|--------------------------------------|-------|-------|----|----------------|

220 **NR-** not reported; **RODAC-** Replicate Organism Detection and Count Plates

221 **Prevalence and types of bacterial isolates**

222 The pooled prevalence of bacterial contamination of mobile phones used by healthcare  
 223 professionals in Africa was 83.9%; 95% CI: (80.6, 87.2%) (Fig.2). the high heterogeneity  
 224 was showed among included studies ( $I^2 = 98\%$ ,  $p = 0.001$ ). As a result, a random effect  
 225 model was used to estimate the pooled prevalence of bacterial contamination of mobile  
 226 phones of healthcare personnel. A univariate meta-regression analysis was performed  
 227 using variables such as year of publication, quality score, and sample size to identify  
 228 credible sources of heterogeneity. Accordingly, the year of publication was a significant  
 229 source of variability among the variables included in the studies (Table 2).

230 The most prevalent bacteria in this review were *coagulase-negative staphylococci*  
 231 (CONS), which accounted for 44.5% of the pooled contamination rate (95% CI: 34.3,  
 232 54.8%) of mobile phones used by healthcare workers, followed by *Staphylococcus*  
 233 *aureus*, which accounted for 32.3% of the pooled contamination rate (95% CI: (34.3,  
 234 54.8%) of mobile phones used by healthcare workers (24.3, 40.2%). On the other hand,  
 235 the gram-negative bacterium *Escherichia coli* was found in 8.4% of mobile phones used  
 236 by healthcare personnel (95% CI: (5.1, 11.7%)) (Fig. 3-5).

237 **Table 2: Factors with the heterogeneity of HCWs mobile phones bacterial**  
 238 **contamination based on univariate meta-regression**

| Variable            | Coefficient | p-value | 95% CI       |
|---------------------|-------------|---------|--------------|
| Year of publication | 3.42        | <0.001  | 2.28, 4.56   |
| Sample size         | -0.03       | 0.003   | -0.05, 0.01  |
| Sub-region          | 0.42        | 0.781   | -2.53, 3.37  |
| Culture media       | -2.28       | 0.414   | -7.74, 3.19  |
| Quality score       | 1.88        | 0.722   | -8.48, 12.24 |

239

240

241 **Sensitivity analysis**

242 The findings were put to the test using a leave-one-out sensitivity analysis. The random-  
243 effects model was shown to be robust, and according to the sensitivity analyses, no  
244 single study had an effect on the pooled rate of bacterial contamination of mobile phones  
245 used by healthcare personnel. The pooled mobile phone bacterial contamination was  
246 nearly equal to the real effect magnitude when a single study was eliminated from a  
247 meta-analysis (Fig. 6).

248 **Publication bias**

249 The funnel plot was used to examine the publication bias. The funnel plot demonstrated  
250 that the item distribution was consistent. We employed Begg's and Egger's tests to  
251 objectively confirm the asymmetry. In the prevalence of bacterial contamination of mobile  
252 phones used by healthcare workers, Egger's test indicated evidence of publishing bias ( $p$   
253 0.001). However, Begg's test revealed no indication of publication bias ( $p = 1.999$ ). (Fig.  
254 7). As a result, a non-parametric trim-and-fill analysis of the publication bias linear  
255 estimator was performed on the left, with the pooled prevalence of bacterial  
256 contamination set to 79.8% (Fig.8).

257 **Subgroup analysis**

258 This meta-analysis used subgroup analysis based on the country's sub-regions, study  
259 setting, and sample size. As a result, the northern African countries had the greatest  
260 pooled prevalence of bacterial contamination of mobile phones, at 87.3% (95% CI: (81.6,  
261 93.0%)), followed by the eastern African countries, at 83.62 % ( 95 % CI: 74.40, 92.84%).  
262 A subgroup analysis depending on the year of publication was also performed. The  
263 combined percentage of bacterial contamination in mobile phones among studies  
264 conducted from 2009 to 2014 and 2015 to 2021 was 62.5% and 88% respectively. The  
265 prevalence of bacterial contamination on mobile phones was 95.2% in studies that used  
266 a selective bacterial isolation method. However, it was found to be 70.4% in studies that  
267 used a non-selective bacterial isolation method, and 86.3% among studies that used  
268 both (selective + non-selective) bacterial isolation methods. A substantial source of  
269 variability was observed across the country's sub-regions, year of publication, types of  
270 healthcare facilities, and bacterial isolation methods of included studies in all subgroup  
271 analyses (Table 3).

272 **Table 3: The subgroup rate of mobile phone bacterial contamination among**  
 273 **healthcare workers in Africa (2009–2021)**

| Variables                 | Subgroup                  | No of included study | Sample size | mobile phone's bacterial contamination rate (95% CI) | Heterogeneity across the studies |         | Heterogeneity between group (p-value) |
|---------------------------|---------------------------|----------------------|-------------|------------------------------------------------------|----------------------------------|---------|---------------------------------------|
|                           |                           |                      |             |                                                      | I <sup>2</sup> (%)               | p-value |                                       |
| Sub-region                | Eastern                   | 9                    | 1613        | 83.62(74.40, 92.84)                                  | 98.4                             | <0.001  | <0.001                                |
|                           | Western                   | 4                    | 168         | 77.97(58.86, 97.07)                                  | 98.6                             | <0.001  |                                       |
|                           | Northern                  | 7                    | 532         | 87.32(81.64, 92.99)                                  | 96.0                             | <0.001  |                                       |
|                           | Southern                  | 1                    | 100         | 30.0(21.0, 38.94)                                    | 0                                |         |                                       |
|                           | Middle                    | 2                    | 210         | 98.1(94.02, 102.17)                                  | 84.0                             | 0.012   |                                       |
| Year of publication       | 2009-2014                 | 6                    | 325         | 62.46(39.97, 84.96)                                  | 98.2                             | <0.001  | 0.027                                 |
|                           | 2015-2021                 | 17                   | 2298        | 83.03(84.78, 91.29)                                  | 97.9                             | <0.001  |                                       |
| Types of Health facility  | Hospital                  | 19                   | 2558        | 84.54(81.16, 87.93)                                  | 98.1                             | <0.001  | <0.001                                |
|                           | Health center             | 1                    | 57          | 98.3(94.94, 101.66)                                  | 0                                |         |                                       |
|                           | Clinic                    | 1                    | 8           | 10.30(-10.76, 31.36)                                 | 0                                |         |                                       |
| Sample size               | ≤ 114                     | 17                   | 937         | 86.10(82.87, 89.32)                                  | 97.4                             | <0.001  | 0.481                                 |
|                           | >114                      | 6                    | 1686        | 82.15(71.65, 92.64)                                  | 97.6                             | <0.001  |                                       |
| Bacteria isolation method | Selective                 | 5                    | 366         | 95.19(91.32, 99.06)                                  | 95.0                             | <0.001  | 0.001                                 |
|                           | non-selective             | 5                    | 761         | 70.39(53.14, 87.64)                                  | 99.0                             | <0.001  |                                       |
|                           | Selective & non-selective | 13                   | 1496        | 86.33(81.13, 91.53)                                  | 97.6                             | <0.001  |                                       |

274

275 **Narrative review**

276 **Antimicrobial susceptibility and multidrug resistance patterns**

277 We descriptively explained the antimicrobial susceptibility and multidrug resistance of  
 278 bacterial isolates using 14 studies [21, 22, 24, 25, 42-46, 53-56, 58]. According to an  
 279 Ethiopian study, bacterial isolates had a greater rate of resistance to *penicillin* (84%),

280 *ampicillin* (81%), and *tetracycline* (81%). Nevertheless, a study conducted in Nigeria  
 281 revealed that over 75% of bacterial isolates were sensitive to *fluoroquinolone* and  
 282 *ceftriaxone* (Table 4).

283 **Table 4: Summary of antimicrobial susceptibility and multidrug resistance pattern**  
 284 **of bacterial isolates in Africa**

| Authors(Year)            | Country  | Antimicrobial susceptibility of the bacterial Isolates                                                                                                                                                                                                                                                                                                                                              | MDR Pattern of Bacterial isolates                                                                                                                                                                                                                                                     |
|--------------------------|----------|-----------------------------------------------------------------------------------------------------------------------------------------------------------------------------------------------------------------------------------------------------------------------------------------------------------------------------------------------------------------------------------------------------|---------------------------------------------------------------------------------------------------------------------------------------------------------------------------------------------------------------------------------------------------------------------------------------|
| Asfaw et al. 2021 [22]   | Ethiopia | Lower resistance rate against <i>ciprofloxacin</i> (24%), <i>gentamycin</i> (23%), and <i>nicol</i> (18 %).                                                                                                                                                                                                                                                                                         | -The overall MDR prevalence was found to be (42.9%).<br>-Bacterial isolates showed a higher resistance rate against <i>penicillin</i> (84%), <i>ampicillin</i> (81%), and <i>tetracycline</i> (42%).                                                                                  |
| Gashaw et al., 2014[45]  | Ethiopia | - <i>Ceftriaxone</i> and <i>ciprofloxacin</i> were effective against 71.7% and 89.1%, respectively, the Gram-positive bacteria<br>-About 87.5% of <i>S. aureus</i> , 89.3% of CONS, and all <i>S. pyogenes</i> isolate.<br>-Among the Gram-negative bacteria <i>E. coli</i> was found to be 100% sensitive to <i>ciprofloxacin</i> , <i>gentamycin</i> , and <i>trimethoprim-sulfamethoxazole</i> . | -More than half (52.2%) and 60.9% of Gram-positive bacteria were resistant to <i>amoxicillin</i> and <i>trimethoprim-sulfamethoxazole</i> .<br>- <i>E. cloacae</i> were 100% resistant to <i>ceftriaxone</i> , <i>ciprofloxacin</i> , <i>amoxicillin</i> , and <i>chloramphenicol</i> |
| Misgana et al., 2014[44] | Ethiopia | -About 81% of the isolates tested for antimicrobial susceptibility                                                                                                                                                                                                                                                                                                                                  | -About 39.40% of <i>S. aureus</i> isolates were MDRSA, of which 38.50% (5/13) were <i>vancomycin-resistant</i> .                                                                                                                                                                      |
| Bodena et al., 2019[46]  | Ethiopia | - <i>Ceftriaxone</i> (80.6%), <i>ciprofloxacin</i> (77.3%), and <i>gentamicin</i> (72.7%) showed higher activity against bacterial isolates,<br>- <i>Ampicillin</i> and <i>trimethoprim-sulfamethoxazole</i> had less effect, with a resistance rate of 61.6% and 56.9%, respectively.                                                                                                              | - Overall prevalence of MDR bacterial isolates was 69.9%.<br>-Amongst all the bacterial isolates, <i>Pseudomonas sp.</i> (87.5%), <i>Klebsiella sp.</i> (86.7%), and <i>Citrobacter sp.</i> (75%) showed MDR                                                                          |
| Araya et al. 2021[24]    | Ethiopia | - High-level resistance to <i>ampicillin</i> was observed in 100% of all isolated species except for :<br><i>Citrobacter</i> (80%) and <i>K. pneumonia</i> (92%)<br><i>K. niae</i> , and <i>E. coli</i> also exhibited substantial resistance to <i>ampicillin</i> (92% and 100%, respectively)                                                                                                     | -About 79.2% of the ESBL-producing isolates showed multidrug resistance.<br>- <i>K. oxytoca</i> , <i>Salmonella spp.</i> , <i>P. vulgaris</i> , and <i>P.mirabilis</i> showed 100% MDR characteristics                                                                                |

|                                    |              |                                                                                                                                                                                                                                                                                                                                            |                                                                                                                                                                                          |
|------------------------------------|--------------|--------------------------------------------------------------------------------------------------------------------------------------------------------------------------------------------------------------------------------------------------------------------------------------------------------------------------------------------|------------------------------------------------------------------------------------------------------------------------------------------------------------------------------------------|
| Mohamedin <i>et al.</i> , 2019[47] | Egypt        | -About 100% of <i>S. aureus</i> was sensitive to Kanamycin and <i>Trimethoprim sulphamethoxazole</i>                                                                                                                                                                                                                                       | -Around 98.2% of <i>S.aureus</i> was resistant to Methicillin, Oxacillin, and Ampicillin antibiotics                                                                                     |
| Mohamadou <i>et al.</i> 2021[53]   | Cameroon     | - <i>Ciprofloxacin</i> (85.7%), <i>Ofloxacin</i> (78.6%), <i>Gentamicin</i> (71.4%) to bacterial isolates                                                                                                                                                                                                                                  | Not reported                                                                                                                                                                             |
| Daoudi <i>et al.</i> , 2017[54]    | Morocco      | Not reported                                                                                                                                                                                                                                                                                                                               | -Of the 17 mobile phones, 6 were contaminated with multi-drug-resistant pathogens, with a contamination rate of 35%.                                                                     |
| Nwankwo <i>et al.</i> , 2014[21]   | Nigeria      | Not reported                                                                                                                                                                                                                                                                                                                               | -High level of bacterial isolate resistance against <i>cotrimoxazole</i> , <i>tetracycline</i> and <i>ampicillin</i> , <i>gentamicin</i> , <i>ceftriaxone</i> , and <i>ciprofloxacin</i> |
| Akinyemi <i>et al.</i> 2009[55]    | Nigeria      | -Over 75% of the isolates were susceptible to the <i>fluoroquinolone</i> and <i>ceftriaxone</i> antibiotics.                                                                                                                                                                                                                               | Not reported                                                                                                                                                                             |
| Bobat <i>et al.</i> , 2016[56]     | South Africa | -All of the <i>S. aureus</i> isolated were <i>methicillin/cloxacillin</i> sensitive.                                                                                                                                                                                                                                                       | Not reported                                                                                                                                                                             |
| Osman <i>et al.</i> , 2018[57]     | Sudan        | - <i>Staphylococcus aureus</i> isolates' sensitivity to Oxacillin was 1.40%.                                                                                                                                                                                                                                                               | - <i>Staphylococcus aureus</i> isolates were 98.6% resistant to Oxacillin                                                                                                                |
| Tusabe <i>et al.</i> 2021[58]      | Uganda       | Not reported                                                                                                                                                                                                                                                                                                                               | -About 45% of the organisms were multidrug-resistant.<br>-Resistance was major to <i>penicillin</i> , <i>cotrimoxazole</i> , <i>ciprofloxacin</i> , and <i>Gentamicin</i>                |
| Mushabati <i>et al.</i> 2021[25]   | Zambia       | -Most of the isolates were susceptible to first-line antimicrobial agents, except penicillin which showed 100% resistance for all Gram-positive isolates.<br>- <i>S. aureus</i> was susceptible to <i>ciprofloxacin</i> (88%), <i>clindamycin</i> (88%), <i>gentamicin</i> (84%), <i>cotrimoxazole</i> (50%) and <i>erythromycin</i> (50%) | Resistance to <i>cefoxitin</i> was detected in 25% (6/24) of <i>S. aureus</i> and 48% (21/49) of CoNS                                                                                    |

285 CONS: Coagulase-negative staphylococci; ESBL: Extended-spectrum beta-lactamase; MDR:  
286 Multidrug resistance

287

288

## 289 Discussion

290 Mobile phones (MPs) are now widely used worldwide and are regarded as one of the  
291 essential gadgets. This technology is thought to be one of the most significant threats to  
292 human health [60, 61]. Healthcare workers' (HCWs') continuous handlings of MPs  
293 promote the spread of healthcare-associated illnesses [62]. In addition, pathogenic  
294 organisms colonizing mobile phones may increase antibiotic resistance [1]. The objective  
295 of this systematic review and meta-analysis was to estimate the pooled prevalence of  
296 bacterial contamination of mobile phones used by healthcare workers in Africa. As a  
297 result, 83.9% of mobile phones were found to be contaminated with bacteria. Mobile  
298 phone bacterial contamination is responsible for different infectious illnesses and  
299 increases the burden of nosocomial infections unless standard guidelines for using and  
300 cleaning mobile phones in health care settings are established [1, 3, 27, 28]. On the  
301 other hand, bacterial contamination of MPs could be a significant concern influencing the  
302 execution of efficient infection prevention measures, thus jeopardizing efforts to limit  
303 cross-contamination [63]. This review's result was somewhat higher than that of a meta-  
304 analysis in Egypt, which reported a pooled prevalence of bacterial contamination of  
305 mobile phones of 78% [26]. Similarly, this review finding was consistent with findings  
306 from a systematic review published elsewhere [64]. The variation in bacterial  
307 contamination of mobile phones could be due to the varying levels of hand hygiene  
308 practiced by healthcare staff, the different models of mobile phones utilized, and  
309 bacterial isolation method [17, 65]. Furthermore, the type and load of bacterial  
310 contamination are known to be influenced by the design of touchscreen phones and the  
311 type of keypad surface [66-68].

312 We conducted a sub-group analysis based on country sub-region, finding that research  
313 from northern African countries had the highest incidence of bacterial contamination in  
314 mobile phones. In contrast, studies from southern African countries had the lowest  
315 prevalence. Compared to research conducted in other countries in sub-regions, most of  
316 the papers included in this review were from eastern and northern African countries, and  
317 differences in healthcare facilities could explain regional heterogeneity. Another reason  
318 for the disparities could be variances in healthcare personnel's hand hygiene standards,

319 mobile phone cleaning methods, and phone types (touchscreen versus Keypad surface).  
320 As a result of our findings, it may be necessary to encourage all African countries to  
321 achieve a zero prevalence of bacterial contamination in mobile phones.

322 A subgroup analysis was also performed using the year of publication and the method of  
323 bacterial isolation. As a result, studies conducted from 2015 to 2021 found a higher  
324 incidence of bacterial contamination in mobile phones than studies conducted from 2009  
325 to 2014, which demonstrated a lower frequency of bacterial contamination. This disparity  
326 could be because smartphones or screen touch mobile phones, which have a high  
327 contamination rate and have been used by healthcare personnel in recent years, have a  
328 high contamination rate. In terms of bacterial isolation methods, research using selective  
329 bacterial isolation methods like MacConkey had the highest frequency of bacterial  
330 contamination on mobile phones compared to studies using non-selective and both  
331 (selective & non-selective) bacterial isolation methods. These differences could be  
332 related to competition among bacteria as selective media inhibit other contaminating  
333 organisms.

334 *Coagulase-negative staphylococci (CONS)* were the most common bacteria isolated in  
335 this review, followed by gram-positive bacteria such as *Staphylococcus aureus*.  
336 However, *Staphylococcus aureus* is the most common bacterial infection in most  
337 countries and is responsible for over 1 million worldwide deaths, with no focus on global  
338 public health expenditure [10]. *Escherichia coli* were the most isolated gram-negative  
339 bacteria from mobile phones used by healthcare personnel. The possible reason for the  
340 high isolation of *Staphylococci* species might be related to their residence in mucosal  
341 systems and the isolation of *E. coli*, possibly due to cross-contamination with  
342 gastrointestinal samples. This finding was in line with findings from other studies [1, 2,  
343 10, 16, 69].

344 The review's second objective was to describe medication sensitivity and resistance  
345 patterns among African bacterial isolates. In a study conducted in Ethiopia, *ceftriaxone*  
346 and *ciprofloxacin* were effective against 71.7% and 89.1% of gram-positive bacterial  
347 isolates such as CONs and *S. aureus*, respectively, while *E. coli* was 100% sensitive to  
348 ciprofloxacin, gentamycin, and trimethoprim-sulfamethoxazole [42]. However, a study



349 conducted in Nigeria found substantial resistance levels to *cotrimoxazole*, *tetracycline*,  
350 *ampicillin*, *gentamicin*, *ceftriaxone*, and *ciprofloxacin* [21]. Most patients who are treated  
351 at home are resistant to one or more antimicrobials [66]. Different bacterial strains,  
352 hospital environment, empirical treatment practice, use of antibacterial as a prophylactic,  
353 easy availability of some drugs without a prescription, drug dose, and  
354 indiscriminate/prolonged use of common antibiotics could all contribute to discrepancies  
355 in antimicrobial susceptibility in the included studies [70].

### 356 **Limitations**

357 This research has certain limitations. Since all of the studies examined were cross-  
358 sectional studies in design, it could be difficult to establish a cause-effect relationship.  
359 The study's findings were only generalizable to the included country's sub-regions. In the  
360 end, only articles written in English were considered. Finally, future researchers should  
361 concentrate on observational studies with well-designed designs, such as cohort and  
362 interventional studies.

### 363 **Conclusion**

364 The contamination of mobile phones used by HCWs with various bacterial isolates was  
365 found to be high in this review. The most common bacteria isolated were *coagulase-*  
366 *negative staphylococci*, *Staphylococcus aureus*, and *Escherichia coli*. The prevalence of  
367 bacterial contamination in mobile phones varies by country and sub-region. Healthcare  
368 workers should be required to practice proper hand hygiene and clean after using their  
369 phones in healthcare facilities. Thus, healthcare planners and policymakers should adopt  
370 guidelines to govern healthcare workers' hand hygiene, disinfection, sterilization, and  
371 cleansing after using mobile phones in healthcare facilities.

### 372 **Ethics approval and consent to participate**

373 Not applicable.

### 374 **Consent for publication**

375 Not applicable.

### 376 **Availability of data and materials**

377 The manuscript contains all pertinent information.

378 **Competing interests**

379 There are no competing interests declared by the authors.

380 **Funding**

381 There was no funding for this work from any entity.

382 **Author's contributions**

383 DZ, BS, GB contributed to the conception, design, data extraction, and AM, FD, FN, DA,  
384 WN, MM, ZT and VC evaluated the methodological quality of the articles included, as  
385 well as the participated in data analysis, interpretation, writing the first draft of the paper.  
386 Finally, the authors read, commented on, edited, and approved the final draft version.

387 **Additional files**

388 Additional file 1: PRISMA checklist (DOC)

389 Additional file 2: Search results of electronic databases (Screenshot)

390 Additional file 3: Risk of bias assessment of included studies (XLSX).

391 **References**

- 392 1. Kotris I, Drenjanèeviaè D, Talapko J, Bukovski S. Identification of microorganisms  
393 on mobile phones of intensive care unit health care workers and medical students  
394 in the tertiary hospital. *Medicinski glasnik*. 2017;14(1).
- 395 2. Heyba M, Ismaiel M, Alotaibi A, Mahmoud M, Baqer H, Safar A, et al.  
396 Microbiological contamination of mobile phones of clinicians in intensive care units  
397 and neonatal care units in public hospitals in Kuwait. *BMC infectious diseases*.  
398 2015;15(1):434-.
- 399 3. Ulger F, Dilek A, Esen S, Sunbul M, Leblebicioglu H. Are healthcare workers'  
400 mobile phones a potential source of nosocomial infections? Review of the  
401 literature. *Journal of infection in developing countries*. 2015;9(10):1046-53.
- 402 4. Prgomet M, Georgiou A, Westbrook JI. The impact of mobile handheld technology  
403 on hospital physicians' work practices and patient care: a systematic review.  
404 *Journal of the American Medical Informatics Association*. 2009;16(6):792-801.
- 405 5. Ventola CL. Mobile devices and apps for health care professionals: uses and  
406 benefits. *Pharmacy and Therapeutics*. 2014;39(5):356.

- 407 6. Manning ML, Davis J, Sparnon E, Ballard RM. iPads, droids, and bugs: Infection  
408 prevention for mobile handheld devices at the point of care. *American journal of*  
409 *infection control*. 2013;41(11):1073-6.
- 410 7. Brady RR, Verran J, Damani N, Gibb A. Review of mobile communication devices  
411 as potential reservoirs of nosocomial pathogens. *Journal of Hospital Infection*.  
412 2009;71(4):295-300.
- 413 8. Smibert O, Aung A, Woolnough E, Carter G, Schultz M, Howden B, et al. Mobile  
414 phones and computer keyboards: unlikely reservoirs of multidrug-resistant  
415 organisms in the tertiary intensive care unit. *Journal of Hospital Infection*.  
416 2018;99(3):295-8.
- 417 9. Christensen G, Bruggemann H. Bacterial skin commensals and their role as host  
418 guardians. *Benef Microbes* 5 (2): 201–215. 2014.
- 419 10. Shah PD, Shaikh NM, Dholaria KV. Microorganisms isolated from mobile phones  
420 and hands of health-care workers in a tertiary care hospital of Ahmedabad,  
421 Gujarat, India. *Indian Journal of Public Health*. 2019;63(2):147.
- 422 11. Ulger F, Dilek A, Esen S, Sunbul M, Leblebicioglu H. Are healthcare workers'  
423 mobile phones a potential source of nosocomial infections? Review of the  
424 literature. *The journal of infection in developing countries*. 2015;9(10):1046-53.
- 425 12. Ustun C, Cihangiroglu M. Health care workers' mobile phones: a potential cause  
426 of microbial cross-contamination between hospitals and community. *Journal of*  
427 *occupational and environmental hygiene*. 2012;9(9):538-42.
- 428 13. Saxena S, Singh T, Agarwal H, Mehta G, Dutta R. Bacterial colonization of rings  
429 and cell phones carried by health-care providers: are these mobile bacterial zoos  
430 in the hospital? *Tropical doctor*. 2011;41(2):116-8.
- 431 14. Bhat SS, Hegde SK, Salian S. Potential of mobile phones to serve as a reservoir  
432 in spread of nosocomial pathogens. *Online Journal of Health and Allied Sciences*.  
433 2011;10(2).
- 434 15. Parthasarathy A, Wong NH, Weiss AN, Tian S, Ali SE, Cavanaugh NT, et al.  
435 Selfies and cellfies: Whole genome sequencing and annotation of five antibiotic  
436 resistant bacteria isolated from the surfaces of smartphones, an inquiry based

- 437 laboratory exercise in a genomics undergraduate course at the rochester institute  
438 of technology. *Journal of genomics*. 2019;7:26.
- 439 16. Pal S, Juyal D, Adekhandi S, Sharma M, Prakash R, Sharma N, et al. Mobile  
440 phones: Reservoirs for the transmission of nosocomial pathogens. *Advanced  
441 biomedical research*. 2015;4.
- 442 17. Galazzi A, Panigada M, Broggi E, Grancini A, Adamini I, Binda F, et al.  
443 Microbiological colonization of healthcare workers' mobile phones in a tertiary-  
444 level Italian intensive care unit. *Intensive and Critical Care Nursing*. 2019;52:17-  
445 21.
- 446 18. Pillet S, Berthelot P, Gagneux-Brunon A, Mory O, Gay C, Viallon A, et al.  
447 Contamination of healthcare workers' mobile phones by epidemic viruses. *Clinical  
448 Microbiology and Infection*. 2016;22(5):456. e1-. e6.
- 449 19. Tannhäuser R, Nickel O, Lindner M, Bethge A, Wolf J, Borte S, et al. Bacterial  
450 contamination of the smartphones of healthcare workers in a German tertiary-care  
451 hospital before and during the COVID-19 pandemic. *American journal of infection  
452 control*. 2021.
- 453 20. Tambe NN, Pai C. A study of microbial flora and MRSA harboured by mobile  
454 phones of health care personnel. *Int J Rec Tre Sci Tech*. 2012;4:14-8.
- 455 21. Nwankwo EO, Ekwunife N, Mofolorunsho KC. Nosocomial pathogens associated  
456 with the mobile phones of healthcare workers in a hospital in Anyigba, Kogi state,  
457 Nigeria. *Journal of epidemiology and global health*. 2014;4(2):135-40.
- 458 22. Asfaw T, Genetu D. High Rate of Bacterial Contamination on Healthcare Worker's  
459 Mobile Phone and Potential Role in Dissemination of Healthcare-Associated  
460 Infection at Debre Berhan Referral Hospital, North Shoa Zone, Ethiopia. *Risk  
461 management and healthcare policy*. 2021;14:2601.
- 462 23. Haghmad A. Prevalence of Bacterial Contamination on Mobile Phones of  
463 Medical Staff in Shendi Hospitals-Sudan. 2021.
- 464 24. Araya S, Desta K, Woldeamanuel Y. Extended-Spectrum Beta-Lactamase-  
465 Producing Gram-Negative Bacteria on Healthcare Workers' Mobile Phones:  
466 Evidence from Tikur Anbessa Specialized Hospital, Addis Ababa, Ethiopia. *Risk  
467 management and healthcare policy*. 2021;14:283-91.

- 468 25. Mushabati N, Samutela M, Yamba K, Ngulube J, Nakazwe R, Nkhoma P, et al.  
469 Bacterial contamination of mobile phones of healthcare workers at the University  
470 Teaching Hospital, Lusaka, Zambia. *Infection Prevention in Practice*.  
471 2021;3(2):100126.
- 472 26. Omran A, Taha MS. Bacterial contamination of mobile phones among health care  
473 workers: A meta-analysis study. *Journal of Medicine in Scientific Research*.  
474 2020;3(2):87.
- 475 27. Pérez-Cano H, Santos MR, Moreno BC. Microbiota in mobile phones of medical  
476 ophthalmologists. *Archivos de la Sociedad Española de Oftalmología (English*  
477 *Edition)*. 2019;94(2):55-9.
- 478 28. Curtis A, Moore Z, Patton D, O'Connor T, Nugent L. Does using a cellular mobile  
479 phone increase the risk of nosocomial infections in the Neonatal Intensive Care  
480 Unit: A systematic review. *Journal of Neonatal Nursing*. 2018;24(5):247-52.
- 481 29. Leong XYA, Chong SY, Koh SEA, Yeo BC, Tan KY, Ling ML. Healthcare workers'  
482 beliefs, attitudes and compliance with mobile phone hygiene in a main operating  
483 theatre complex. *Infection Prevention in Practice*. 2020;2(1):100031.
- 484 30. Bhardwaj N, Khatri M, Bhardwaj SK, Sonne C, Deep A, Kim KH. A review on  
485 mobile phones as bacterial reservoirs in healthcare environments and potential  
486 device decontamination approaches. *Environmental research*. 2020;186:109569.
- 487 31. Nejad SB, Allegranzi B, Syed SB, Ellis B, Pittet D. Health-care-associated  
488 infection in Africa: a systematic review. *Bulletin of the World Health Organization*.  
489 2011;89:757-65.
- 490 32. Pasquarella C, Pitzurra O, Savino A. The index of microbial air contamination.  
491 *Journal of hospital infection*. 2000;46(4):241-56.
- 492 33. Website. Your Cell Phone Is 10 Times Dirtier Than a Toilet Seat [Internet, Time  
493 (2021) <http://timecom/4908654/cell-phone-bacteria/>. Mar, 2019 16.
- 494 34. Simmonds R, Lee D, Hayhurst E. Mobile phones as fomites for potential  
495 pathogens in hospitals: microbiome analysis reveals hidden contaminants.  
496 *Journal of Hospital Infection*. 2020;104(2):207-13.
- 497 35. Beer D, Vandermeer B, Brosnikoff C, Shokoples S, Rennie R, Forgie S.  
498 BACTERIAL CONTAMINATION OF HEALTH CARE WORKERS'PAGERS AND

- 499 THE EFFICACY OF VARIOUS DISINFECTING AGENTS. The Pediatric infectious  
500 disease journal. 2006;25(11):1074-5.
- 501 36. Huffman S, Webb C, Spina SP. Investigation into the cleaning methods of  
502 smartphones and wearables from infectious contamination in a patient care  
503 environment (I-SWIPE). American journal of infection control. 2020;48(5):545-9.
- 504 37. Stern C, Lizarondo L, Carrier J, Godfrey C, Rieger K, Salmond S, et al.  
505 Methodological guidance for the conduct of mixed methods systematic reviews.  
506 JBI evidence synthesis. 2020;18(10):2108-18.
- 507 38. Getachew H, Derbie A, Mekonnen D. Surfaces and air bacteriology of selected  
508 wards at a referral hospital, Northwest Ethiopia: A cross-sectional study.  
509 International Journal of Infectious Diseases. 2020;101:44-5.
- 510 39. Wayne P. Clinical and Laboratory Standards Institute: Performance Standards for  
511 Antimicrobial Susceptibility Testing: Informational Supplement, M100. Clinical and  
512 Laboratory Standards Institute (CLSI); 2018.
- 513 40. Moola S. Chapter 7: systematic reviews of etiology and risk in: Aromataris E,  
514 Munn Z, eds Joanna Briggs institute reviewer's manual. The Joanna Briggs  
515 Institute, 2017.
- 516 41. Higgins J, Altman D, Gøtzsche P, Jüni P, Moher D, Oxman A, et al. Cochrane  
517 bias methods group; cochrane statistical methods group. The Cochrane  
518 Collaboration's tool for assessing risk of bias in randomised trials BMJ.  
519 2011;343(7829):d5928.
- 520 42. Daka D. Antibiotic-resistant Staphylococcus aureus isolated from mobile phone  
521 and hands of Health care workers in the Hawassa referral Hospital, South  
522 Ethiopia. Journal of Microbiology and Antimicrobials. 2014;6(4):72-8.
- 523 43. Ayalew W, Mulu W, Biadlegne F. Bacterial contamination and antibiogram of  
524 isolates from health care workers' fomites at Felege Hiwot Referral Hospital,  
525 northwest Ethiopia. Ethiopian Journal of Health Development. 2019;33(2).
- 526 44. Misgana GM, Abdissa K, Abebe G. Bacterial contamination of mobile phones of  
527 health care workers at Jimma University Specialized Hospital, Jimma, South West  
528 Ethiopia. International Journal of Infection Control. 2015;11(1).

- 529 45. Gashaw M, Abteu D, Addis Z. Prevalence and antimicrobial susceptibility pattern  
530 of bacteria isolated from mobile phones of health care professionals working in  
531 Gondar town health centers. *International Scholarly Research Notices*.  
532 2014;2014.
- 533 46. Bodena D, Teklemariam Z, Balakrishnan S, Tesfa T. Bacterial contamination of  
534 mobile phones of health professionals in Eastern Ethiopia: antimicrobial  
535 susceptibility and associated factors. *Tropical medicine and health*. 2019;47:15.
- 536 47. Mohamedin A, Elsayed A, Nashnoush HA. Bacterial Contamination of Mobile  
537 Phones Healthcare Versus Non-Healthcare Workers at Mansoura City, Egypt.  
538 *Journal of Plant Protection and Pathology*. 2019;10(2):101-9.
- 539 48. Elgabeery RE. Healthcare Workers' Mobile Phones as a Possible Vehicle of  
540 Nosocomial Pathogens and the Role of Different Disinfectants in their  
541 Decontamination. *Egyptian Journal of Medical Microbiology*. 2021;30(3):29-36.
- 542 49. Selim HS, Abaza AF. Microbial contamination of mobile phones in a health care  
543 setting in Alexandria, Egypt. *GMS hygiene and infection control*. 2015;10:Doc03-  
544 Doc.
- 545 50. Shahaby A, Awad N, El-Tarras A, Bahobial A. Mobile phone as potential  
546 reservoirs of bacterial pathogens. *African Journal of Biotechnology*.  
547 2012;11(92):15896-904.
- 548 51. Yar DD, Francis G, Roland K, Collins O-A, Balali GI, Kuffour RA, et al. Mobile  
549 Phones of Healthcare Workers are Possible Source of Nosocomial Infections:  
550 Evidence from Asante-Mampong Municipal Government Hospital, Ghana.
- 551 52. Fandoh ME. Mobile Phone Use and Associated Bacterial Contamination in the  
552 Neonatal Intensive Care Unit of the Korle-Bu Teaching Hospital: University Of  
553 Ghana; 2018.
- 554 53. Mohamadou M, Kountchou L, Mbah C, Bamia A, Abdouraman B, Ngoutane A.  
555 Social Habits of Health Professionals and their Mobile Phones as Source of MDR  
556 Nosocomial Bacteria in Cameroon, Sub Saharan Africa. *J Infect Dis Prev Med*.  
557 2021;9:214.
- 558 54. Daoudi A, Nadia El Idrissi S, Bennaoui F, Alaoui M, Soraa N, Fadl Mrabih Rabou  
559 M. Study of Bacterial Contamination of Mobile Phones and Stethoscopes in

- 560 Neonatal Intensive Care Unit. International journal of pediatrics (Mashhad).  
561 2017;5(11):6139-42.
- 562 55. Akinyemi KO, Atapu AD, Adetona OO, Coker AO. The potential role of mobile  
563 phones in the spread of bacterial infections. The Journal of Infection in Developing  
564 Countries. 2009;3(08):628-32.
- 565 56. Bobat R, Archary M, Lawler M, Mawlana S, Naidoo KL, Maphumulo S, et al. The  
566 presence and spectrum of bacteria colonising mobile phones of staff and  
567 caregivers in high disease burden paediatric and neonatal wards in an urban  
568 teaching hospital in Durban, South Africa. Southern African Journal of Infectious  
569 Diseases. 2017;32(1):9-11.
- 570 57. Osman M, Omer S, Almugadam B, Ahmed H. Frequency of MRSA isolates in  
571 mobile phones, ears and hands of healthcare workers. J Antimicrob Agents.  
572 2018;4(161):2472-1212.1000161.
- 573 58. Tusage Fred. Bacterial Contamination of Healthcare worker's Mobile Phones; a  
574 Case Study at Two Referral Hospitals in Uganda. 2021.
- 575 59. Christelle KM, Hendrick ML, Henri MT. Microbial Ecology of Mobile Phones Staff  
576 Maternity Hospital Public Lubumbashi, DR Congo. Microbiol Infect Dis.  
577 2019;3(3):1-4.
- 578 60. Goldblatt JG, Krief I, Klonsky T, Haller D, Milloul V, Sixsmith DM, et al. Use of  
579 cellular telephones and transmission of pathogens by medical staff in New York  
580 and Israel. Infection Control & Hospital Epidemiology. 2007;28(4):500-3.
- 581 61. Kirkby S, Biggs C, Ikuta L, Zukowsky K. Cell phones in the neonatal intensive  
582 care unit. Advances in Neonatal Care. 2016;16(6):404-9.
- 583 62. Koroglu M, Gunal S, Yildiz F, Savas M, Ozer A, Altindis M. Comparison of  
584 keypads and touch-screen mobile phones/devices as potential risk for microbial  
585 contamination. Journal of infection in developing countries. 2015;9(12):1308-14.
- 586 63. Shakir IA, Patel NH, Chamberland RR, Kaar SG. Investigation of cell phones as a  
587 potential source of bacterial contamination in the operating room. JBJS.  
588 2015;97(3):225-31.
- 589 64. Loyola S, Gutierrez LR, Horna G, Petersen K, Agapito J, Osada J, et al.  
590 Extended-spectrum  $\beta$ -lactamase-producing Enterobacteriaceae in cell phones of



- 591 health care workers from Peruvian pediatric and neonatal intensive care units.  
592 American journal of infection control. 2016;44(8):910-6.
- 593 65. Shahlol A, Khalifallah H, Shahlol E, Dastidar R, Halder M, Lamichhane G.  
594 Bacterial contamination of mobile phones and hands of health care workers in  
595 Sabha Medical Center Hospital, Fazzan area in southwestern of LIBYA.  
596 International Journal of Research in Medical Sciences. 2015;1(4):1-8.
- 597 66. Morvai J, Szabó R. The role of mobile communication devices in the spread of  
598 infections. Orvosi Hetilap. 2015;156(20):802-7.
- 599 67. Brady RR, Chitnis S, Stewart RW, Graham C, Yalamarathi S, Morris K. NHS  
600 connecting for health: healthcare professionals, mobile technology, and infection  
601 control. Telemedicine journal and e-health : the official journal of the American  
602 Telemedicine Association. 2012;18(4):289-91.
- 603 68. Al Momani W, Khatatbeh M, Altaany Z. Antibiotic susceptibility of bacterial  
604 pathogens recovered from the hand and mobile phones of university students.  
605 Germs. 2019;9(1):9.
- 606 69. Organization WH. Antimicrobial resistance: global report on surveillance: World  
607 Health Organization; 2014.
- 608 70. Control CfD, Prevention. Antibiotic resistance threats in the United States, 2013  
609 Atlanta. GA: CDC. 2013.

610

611

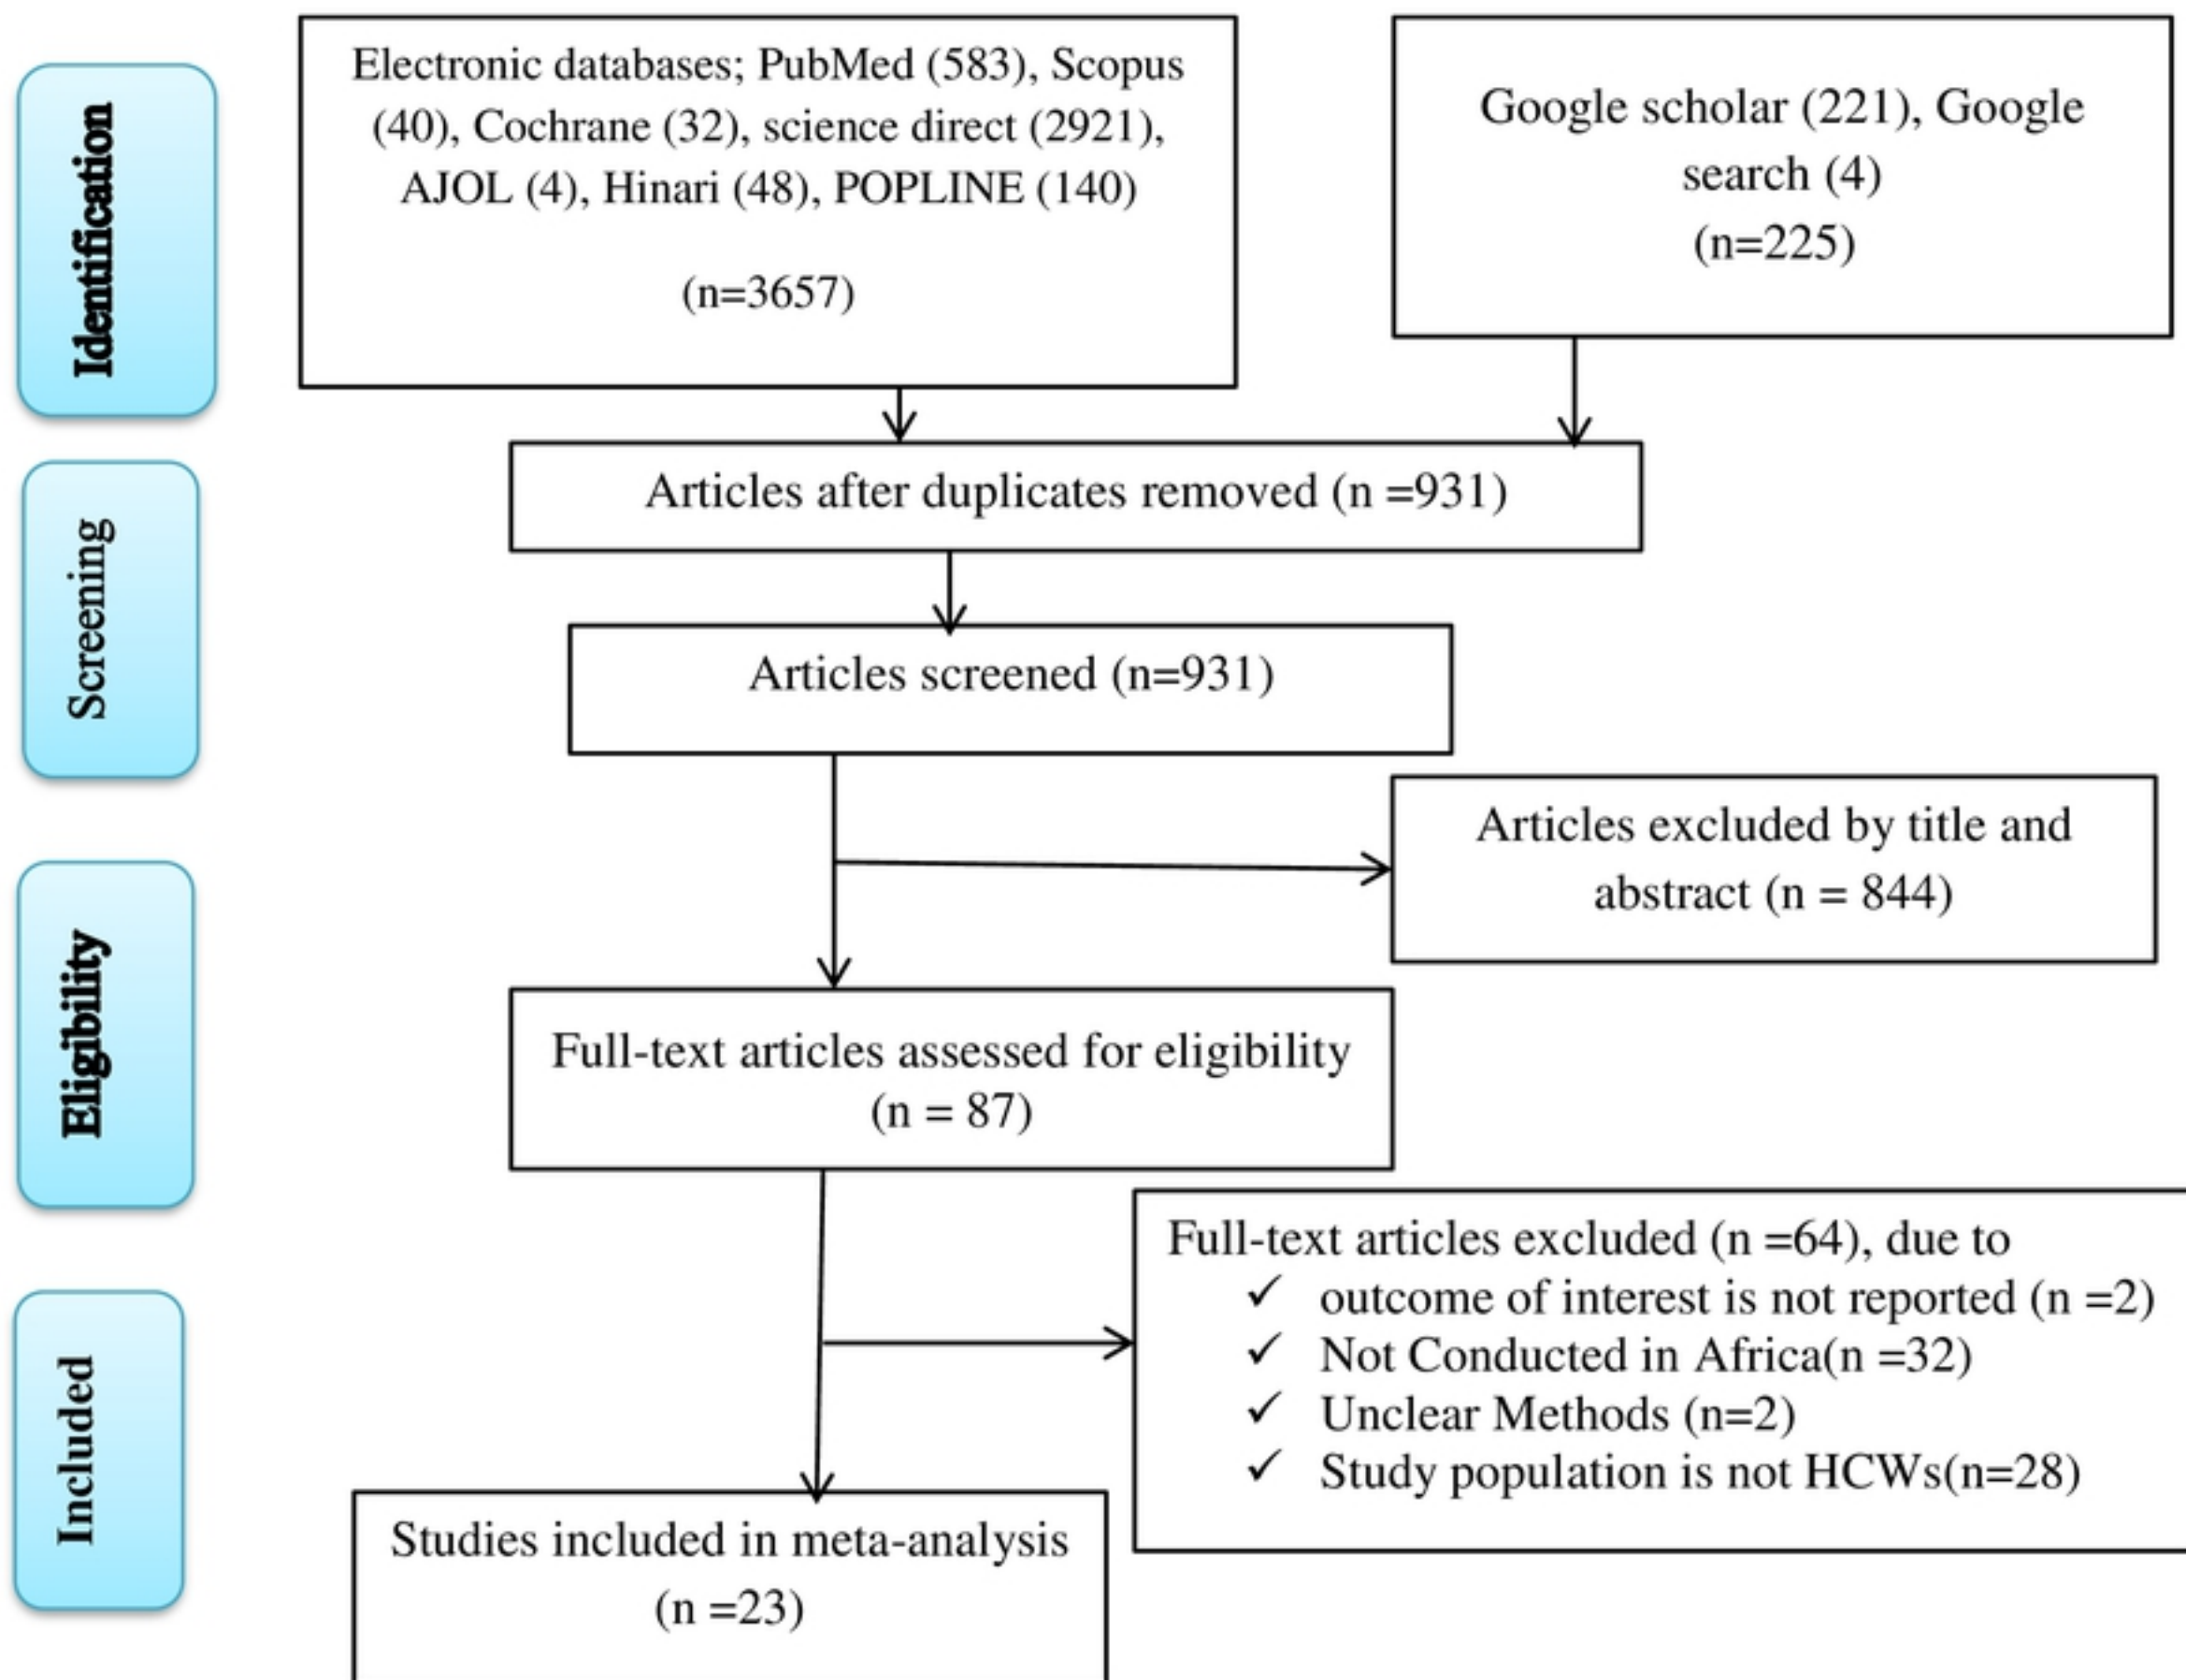

**Figure 1: Flow chart of study selection for systematic review and meta-analysis of bacterial contamination of mobile phones among healthcare workers in Africa.**

medRxiv preprint doi: <https://doi.org/10.1101/2022.05.27.22275700>; this version posted May 27, 2022. The copyright holder for this preprint (which was not certified by peer review) is the author/funder, who has granted medRxiv a license to display the preprint in perpetuity. It is made available under a [CC-BY 4.0 International license](https://creativecommons.org/licenses/by/4.0/).

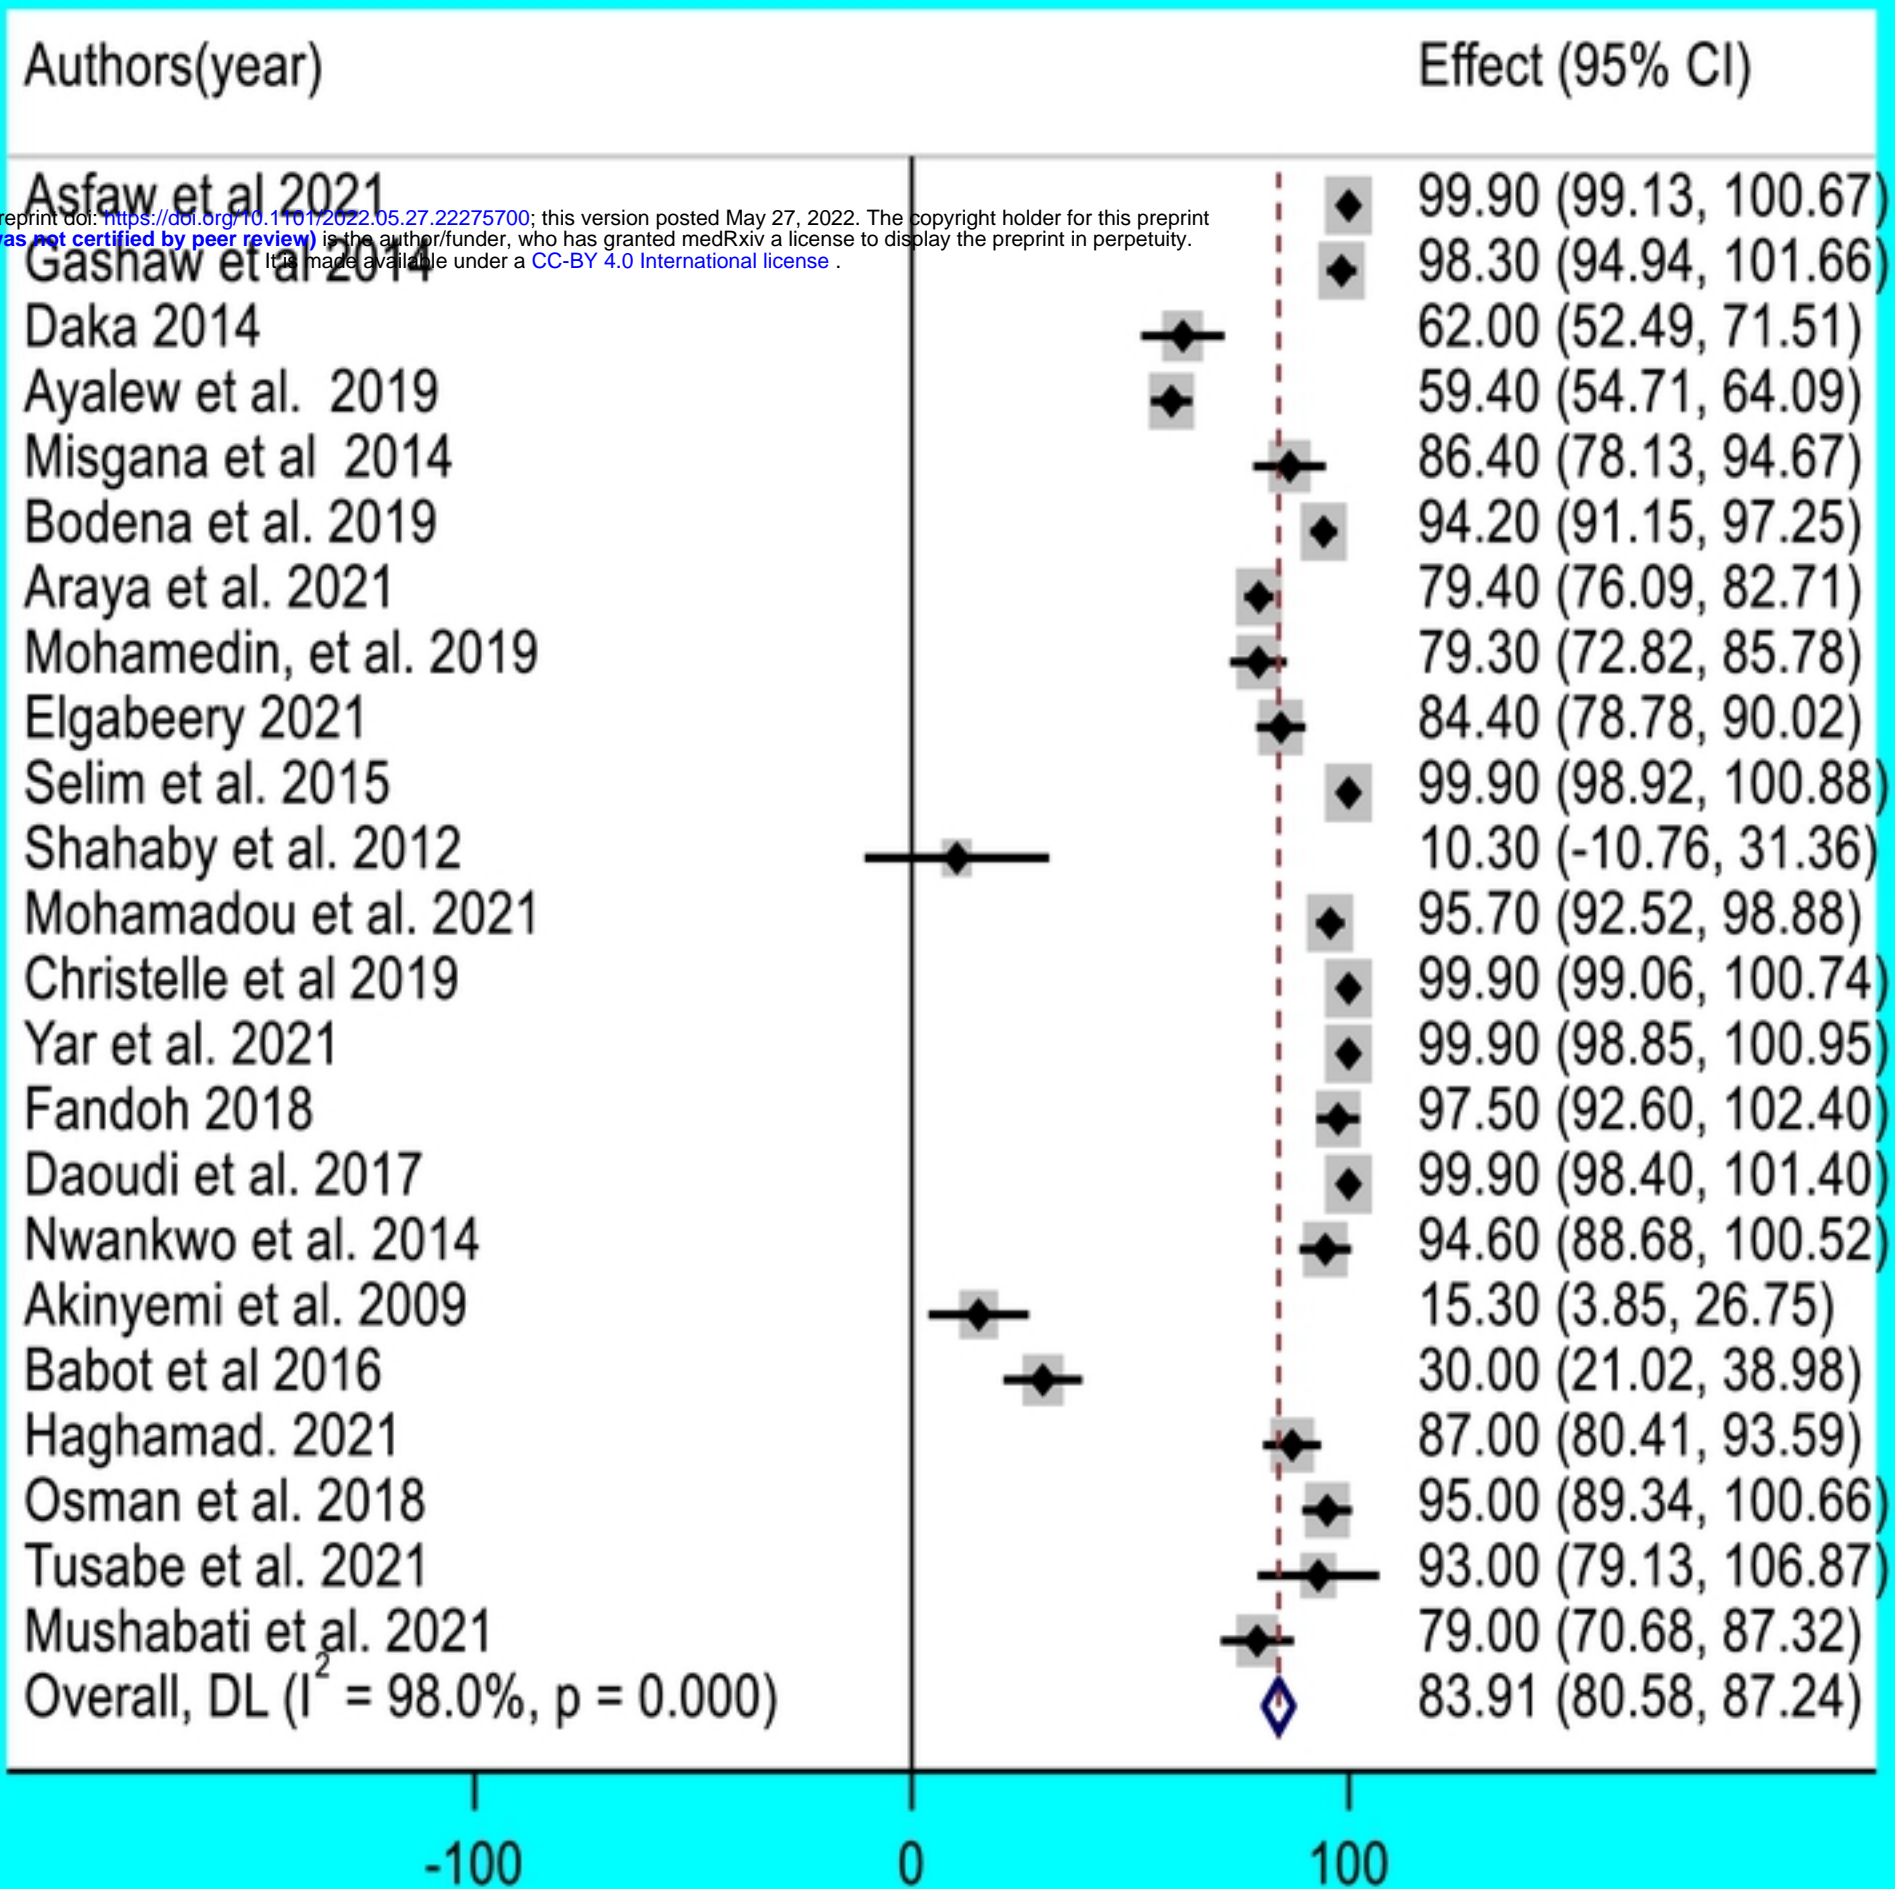

NOTE: Weights are from random-effects model

Figure 2: Forest plot of pooled bacterial contamination rate of mobile phones used by healthcare workers in Africa.

Authors(year)

Effect (95% CI)

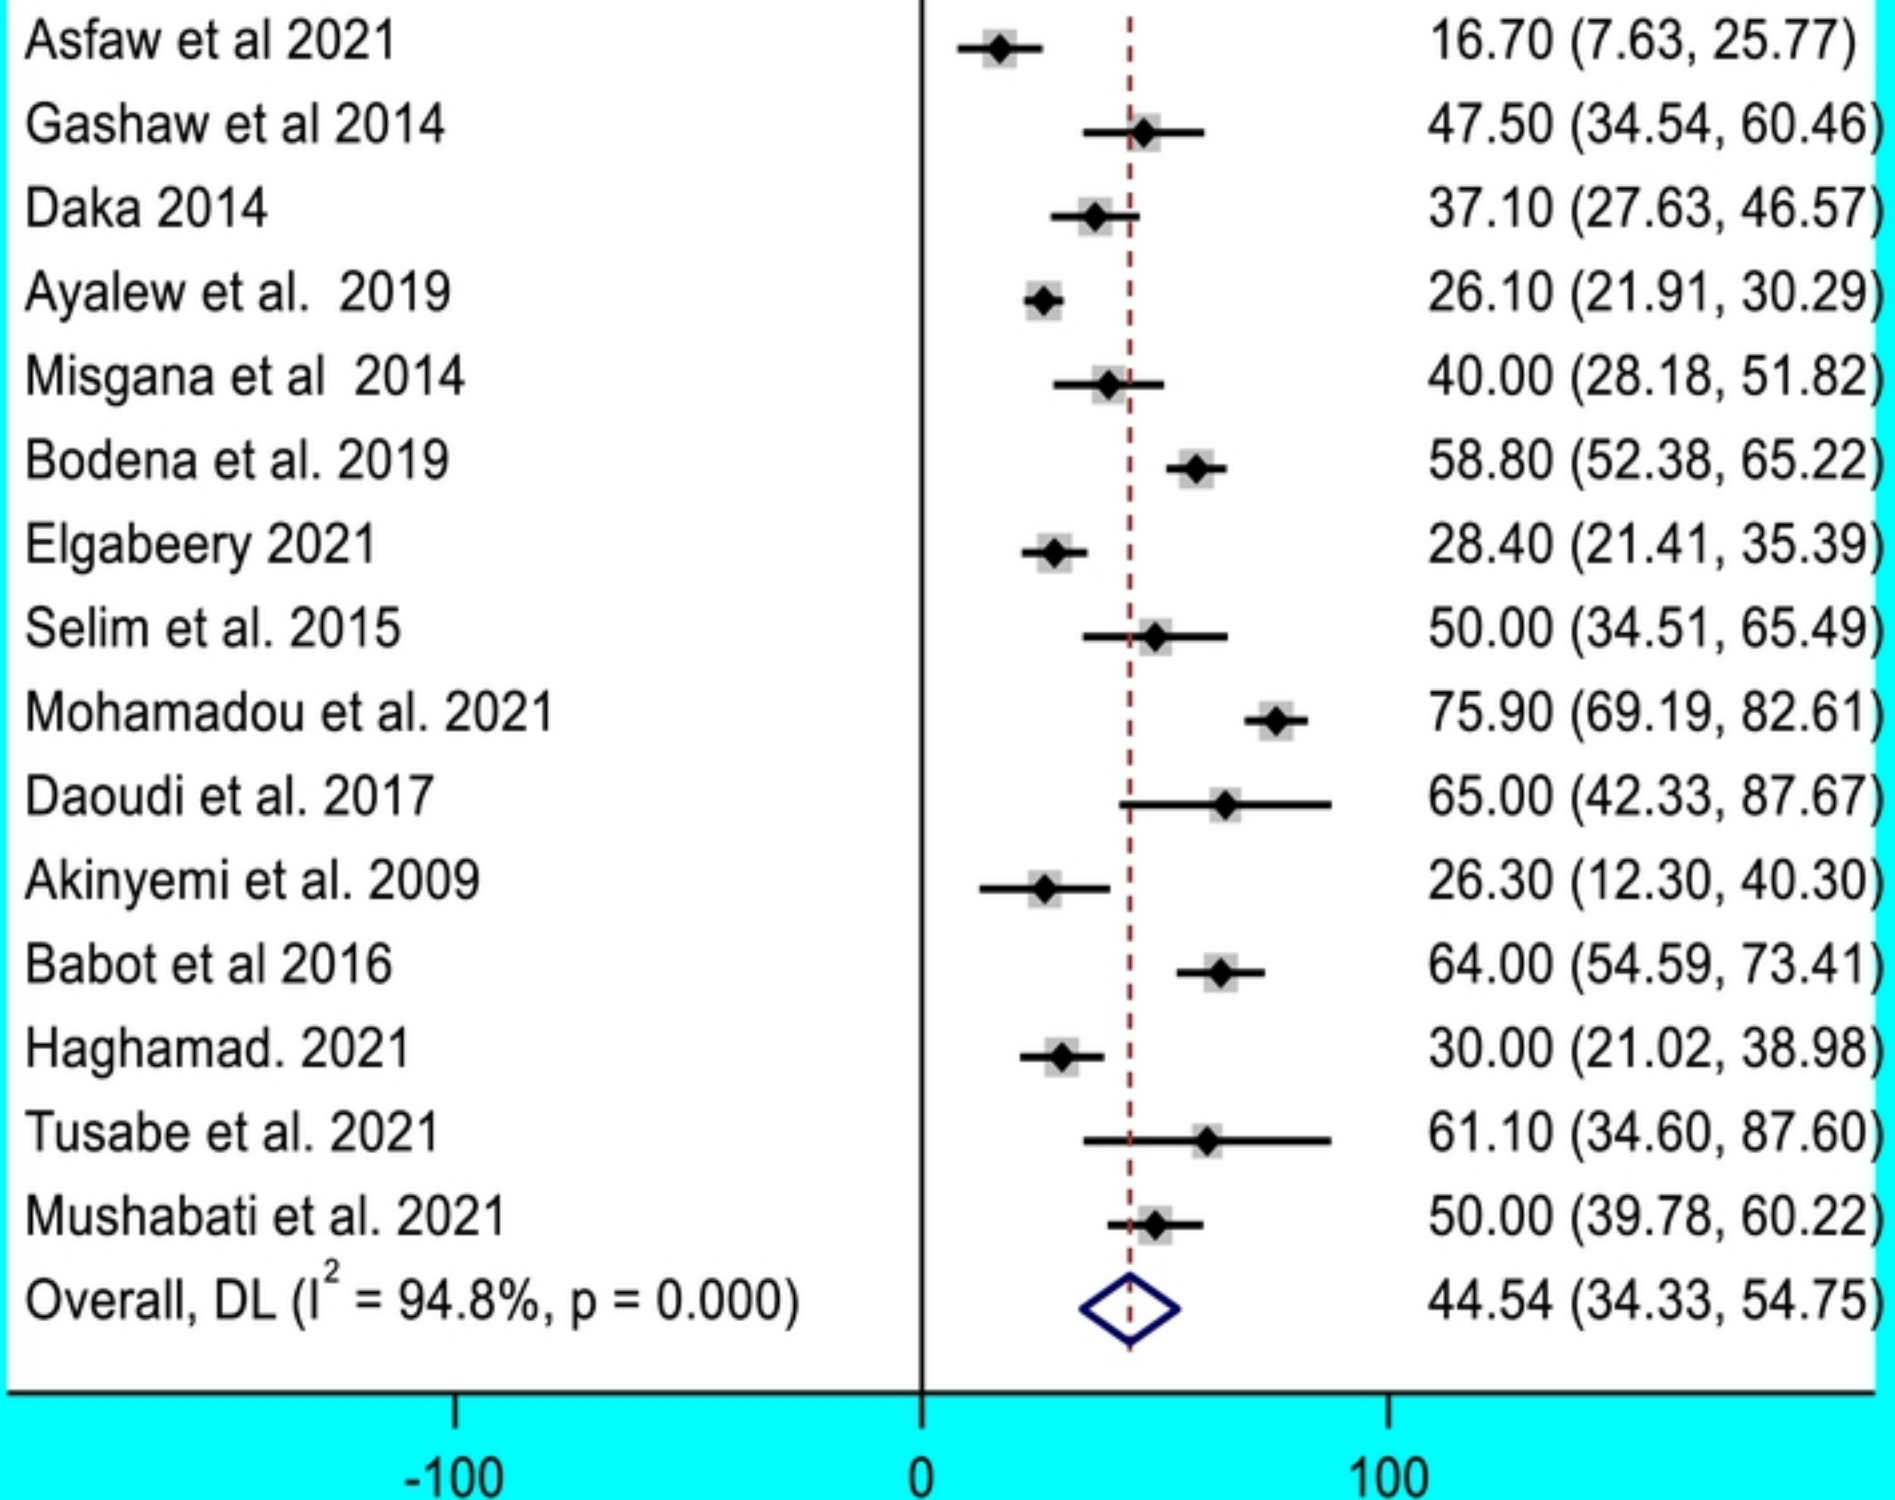

NOTE: Weights are from random-effects model

Figure 3: Forest plot of pooled contamination rate of mobile phones of healthcare workers by coagulase-negative staphylococci in Africa.

medRxiv preprint doi: <https://doi.org/10.1101/2022.05.27.22275700>; this version posted May 27, 2022. The copyright holder for this preprint (which was not certified by peer review) is the author/funder, who has granted medRxiv a license to display the preprint in perpetuity. It is made available under a CC-BY 4.0 International license.

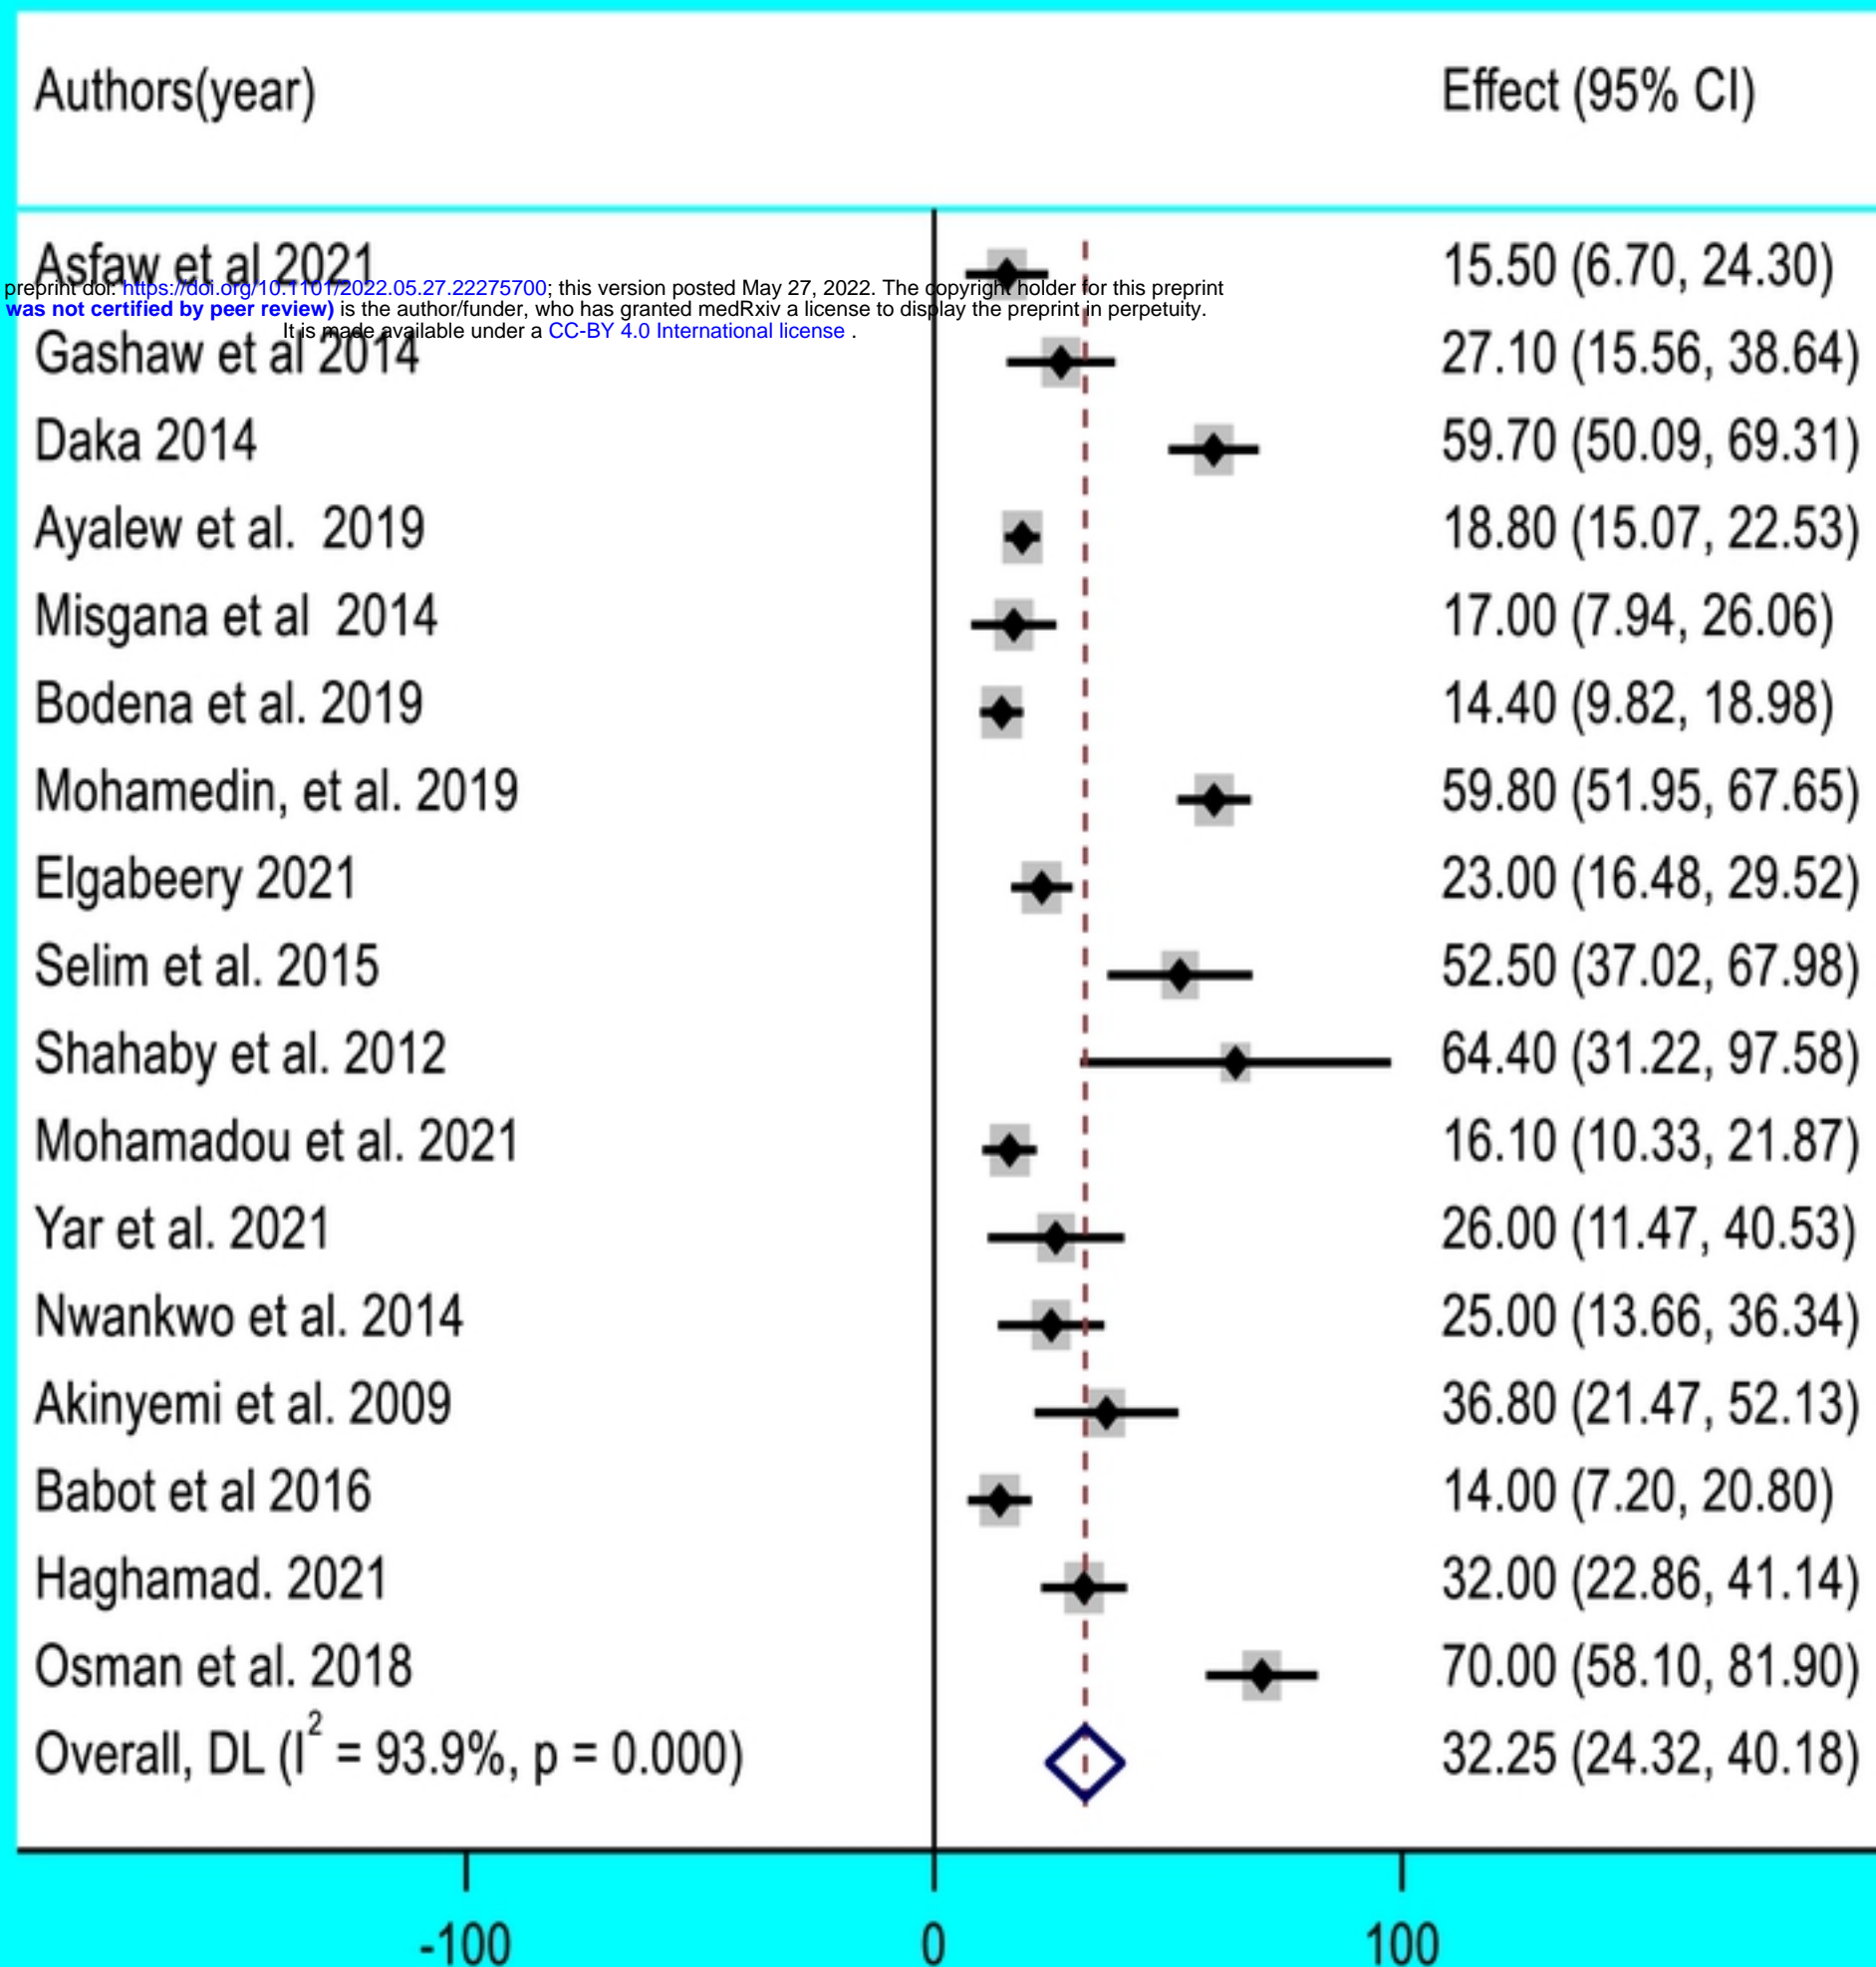

NOTE: Weights are from random-effects model

Figure 4: Forest plot of pooled contamination rate of mobile phones of healthcare workers by *Staphylococcus aureus* in Africa.

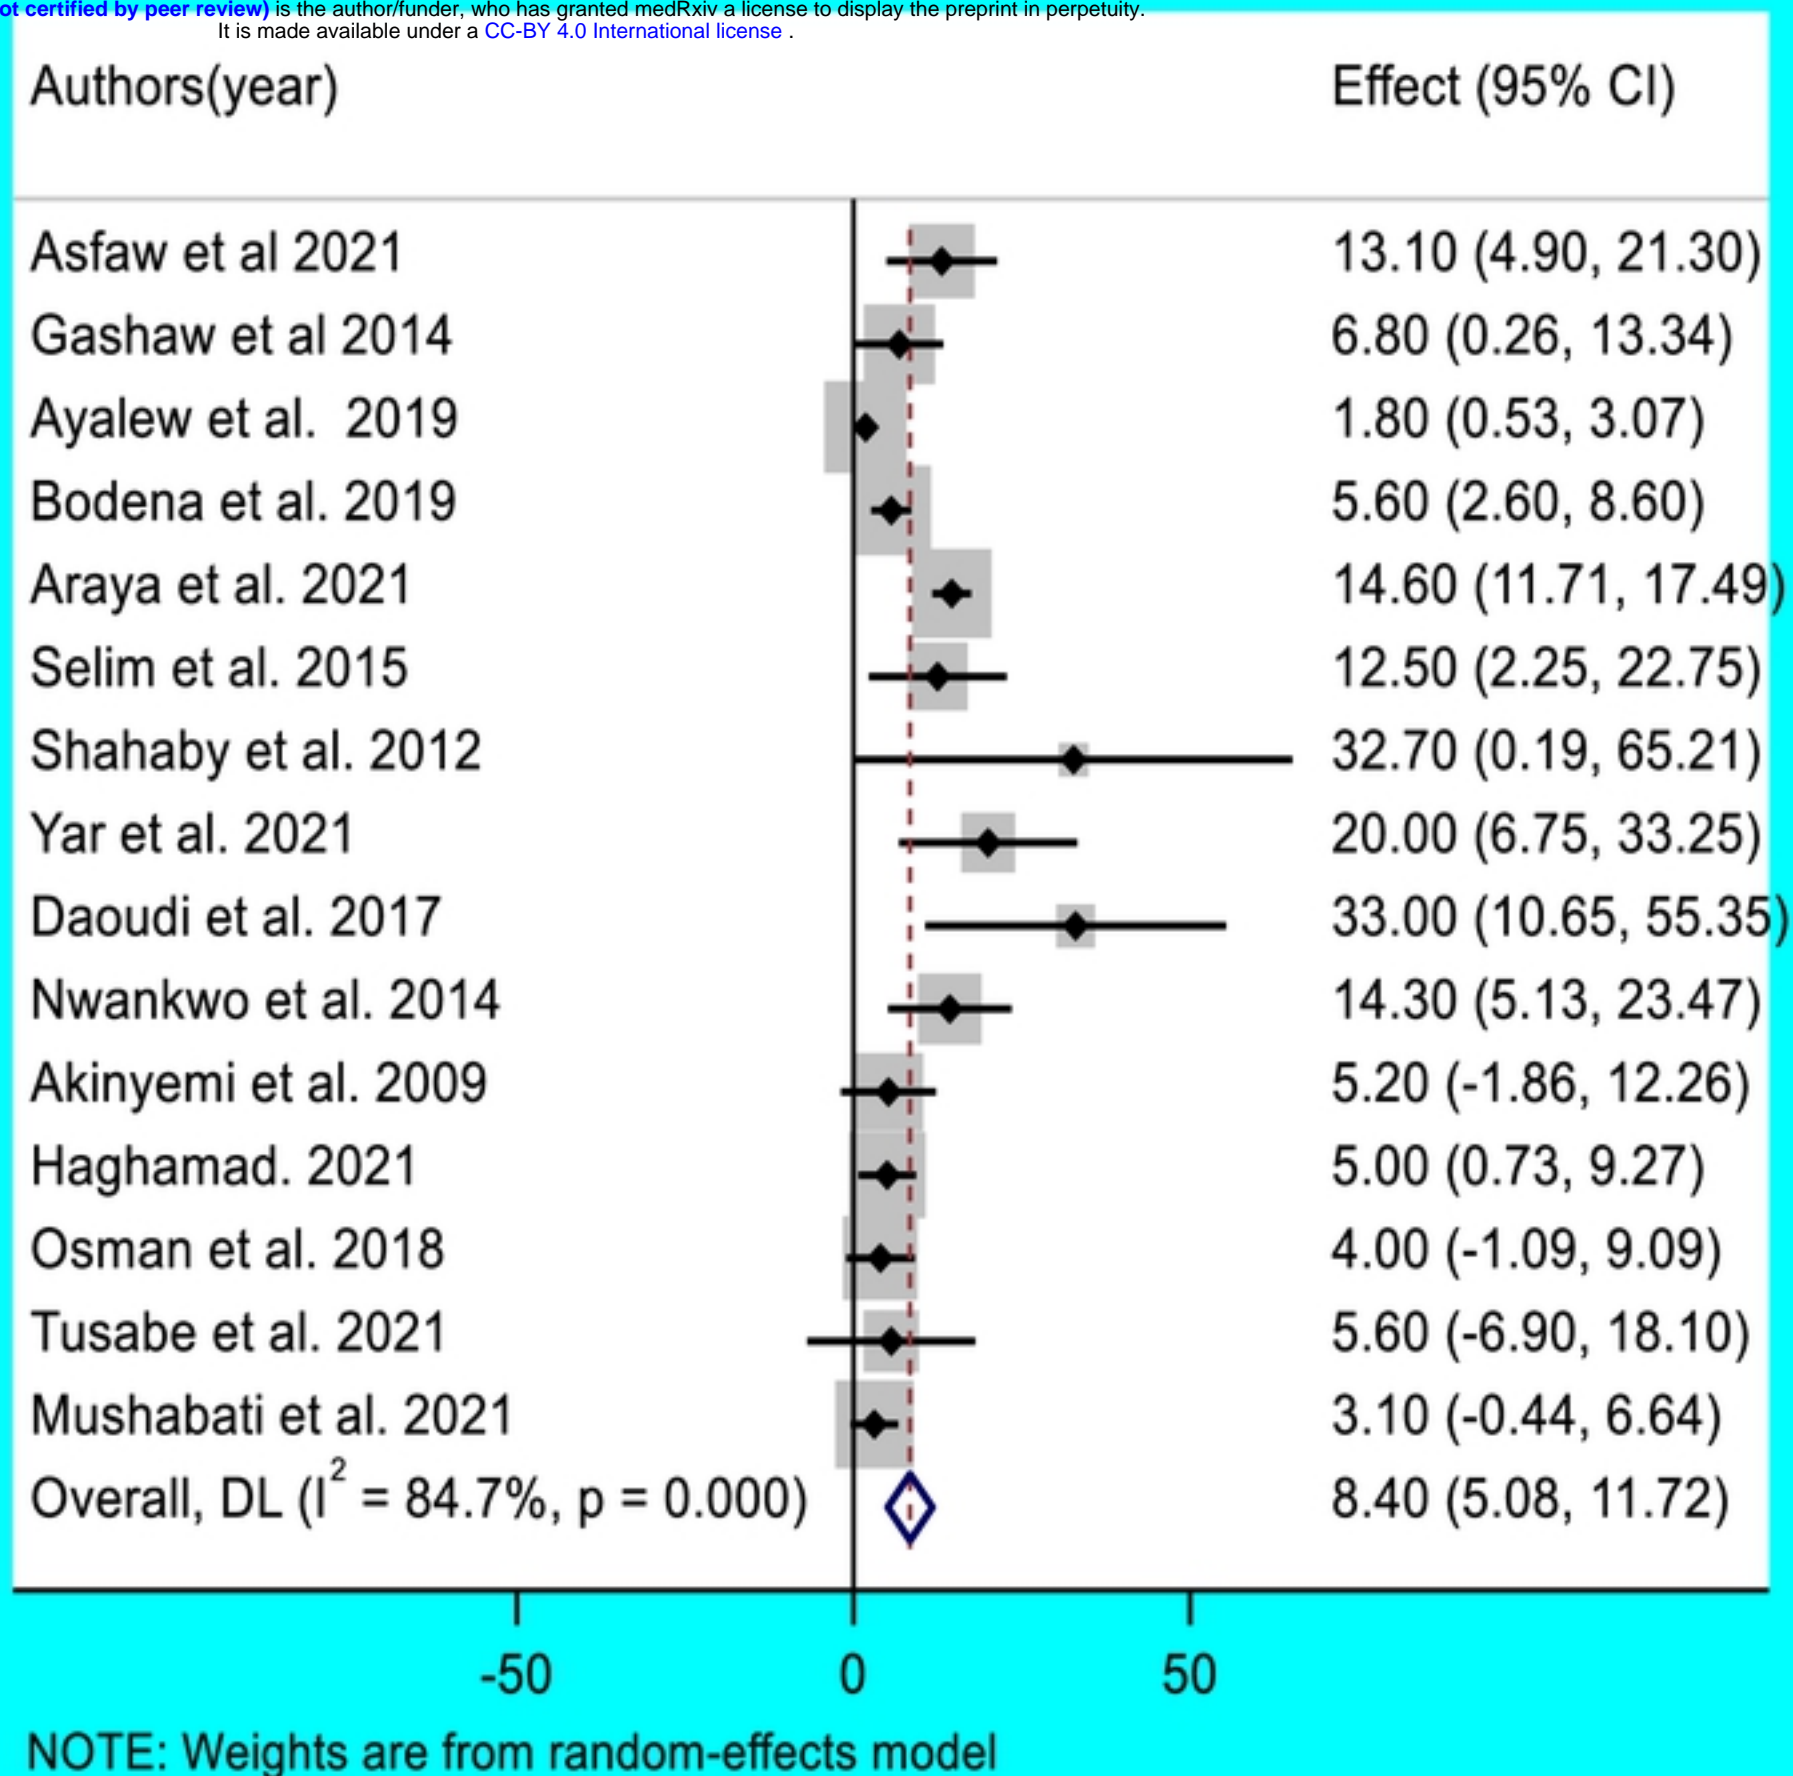

Figure 5: Forest plot of pooled contamination rate of mobile phones of healthcare workers by Escherichia Coli in Africa.

# Meta-analysis estimates, given named study is omitted

medRxiv preprint doi: <https://doi.org/10.1101/2022.05.27.22275704>; this version posted May 27, 2022. The copyright holder for this preprint (which was not certified by peer review) is the author/funder, who has granted medRxiv a license to display the preprint in perpetuity. It is made available under a [CC-BY 4.0 International license](https://creativecommons.org/licenses/by/4.0/).

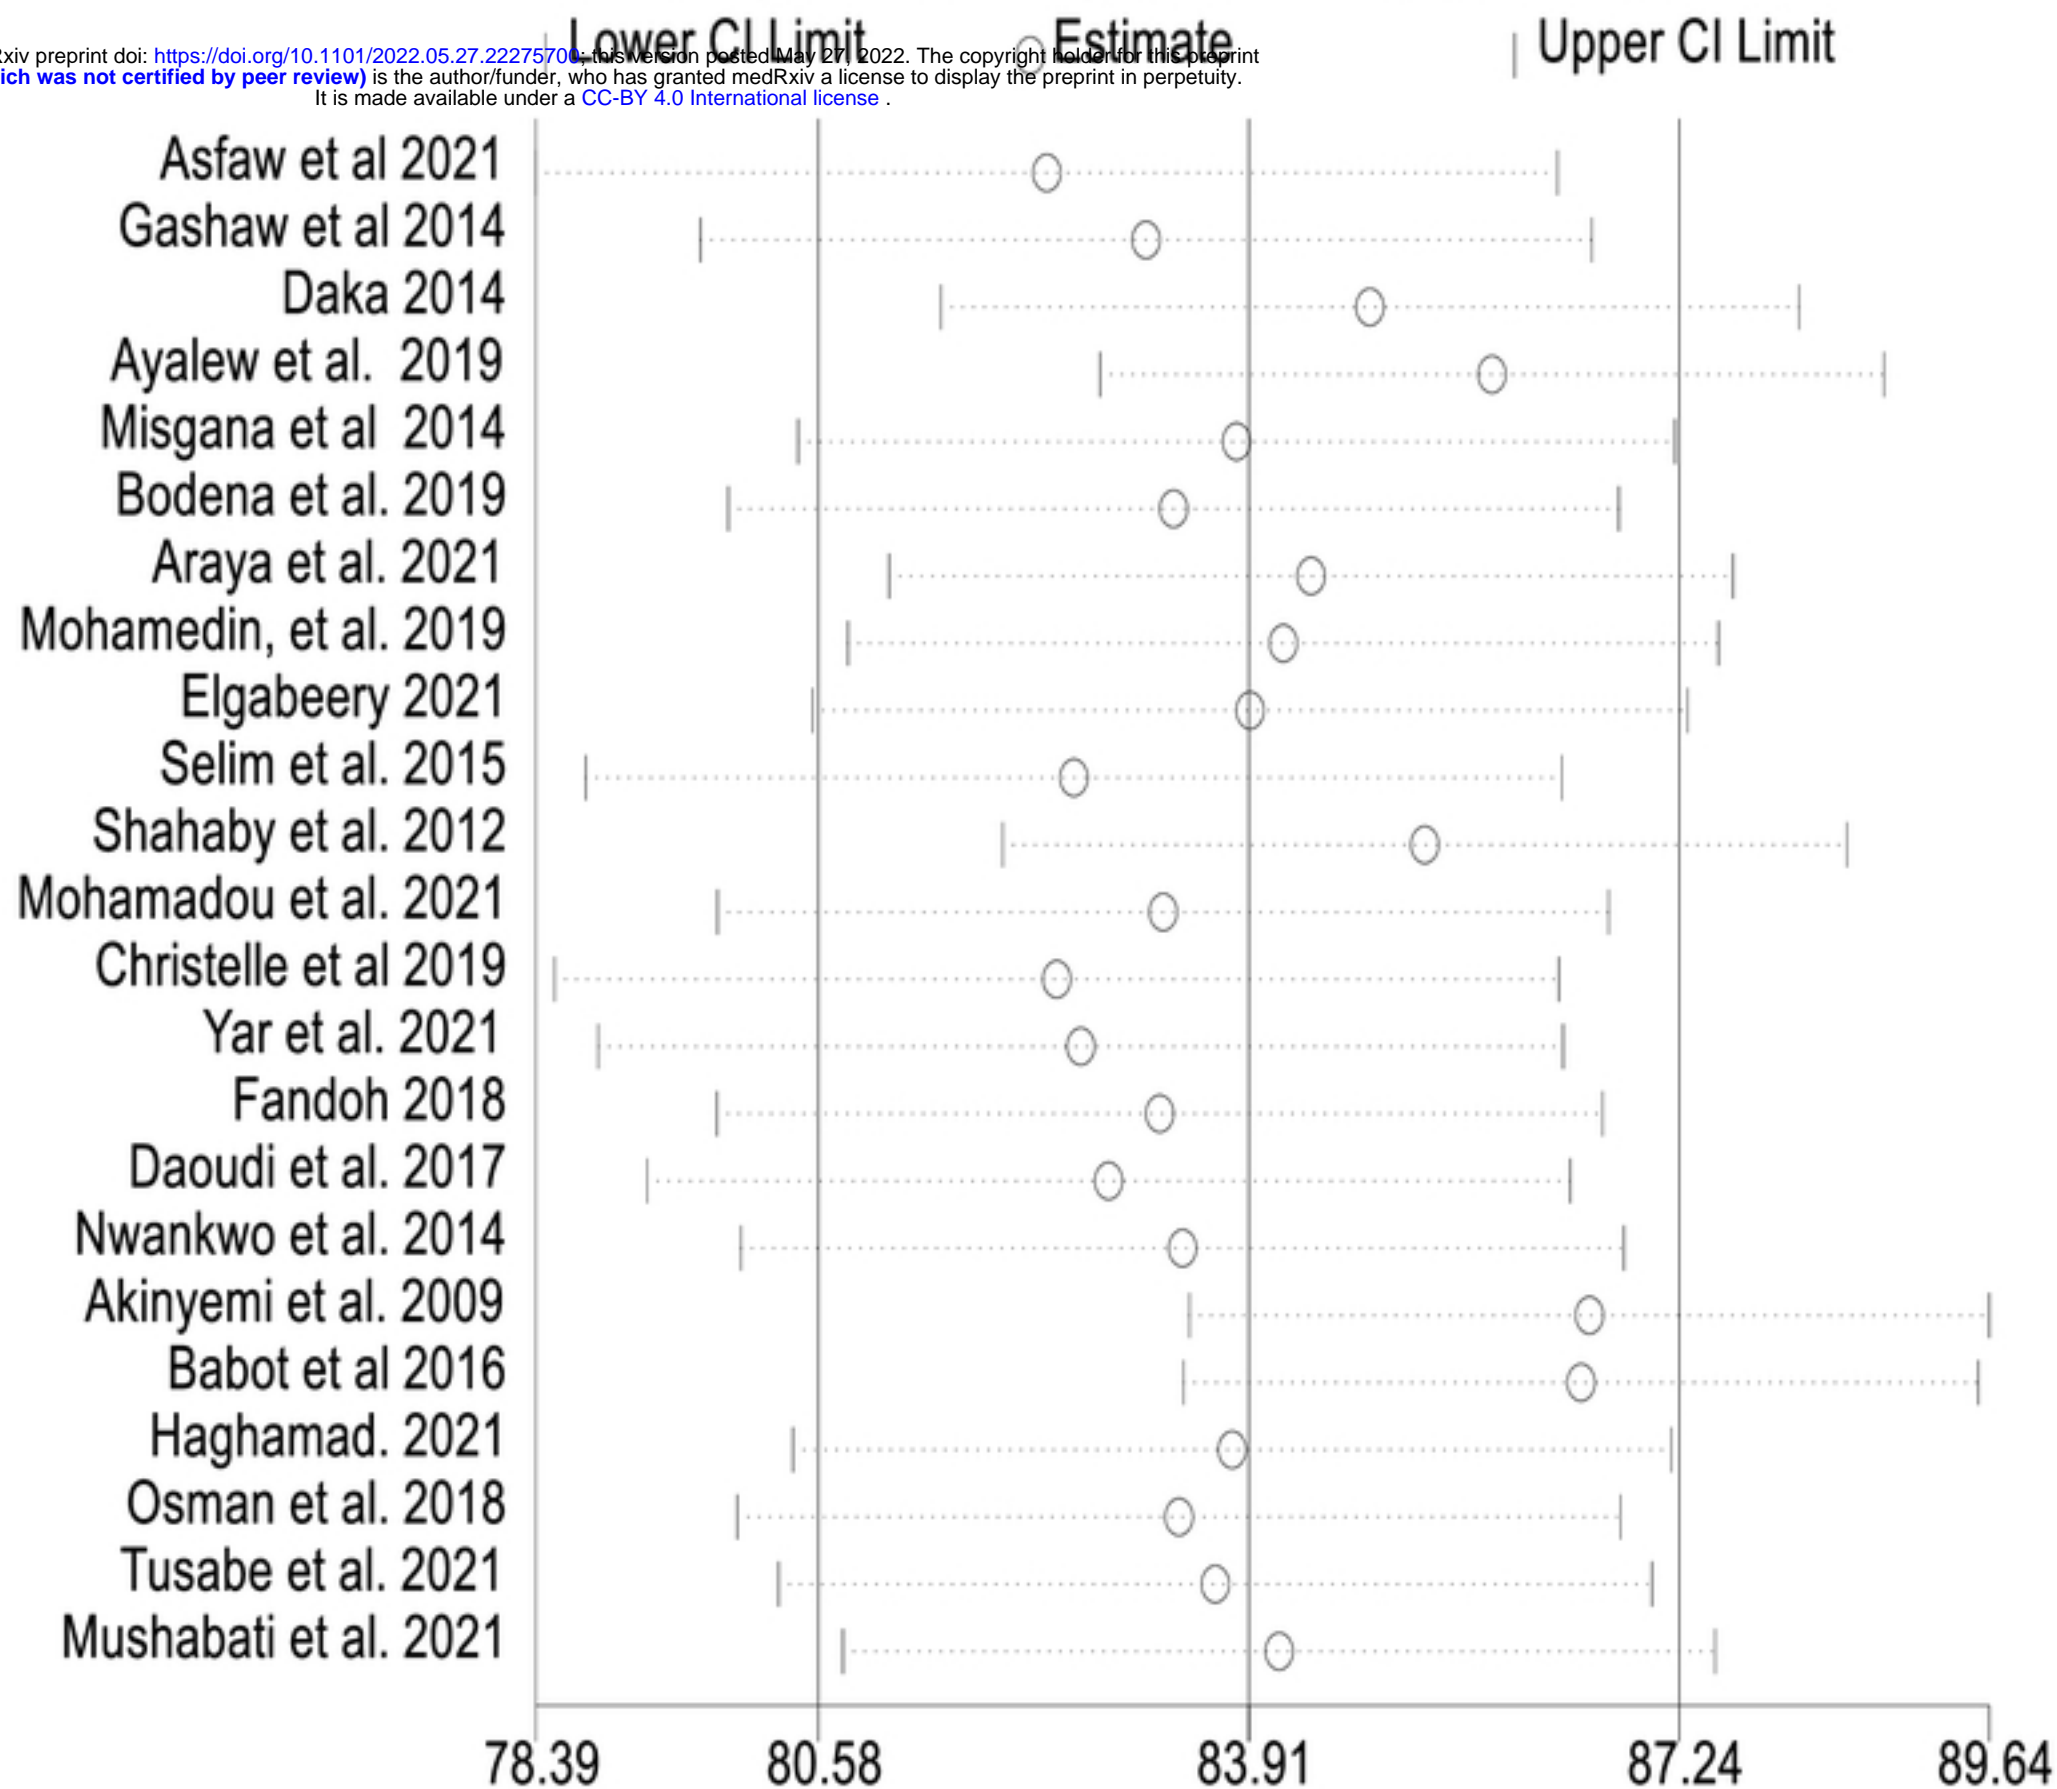

**Figure 6: Sensitivity analysis of mobile phones bacterial contamination removed at a time: contamination rate and 95% confidence interval among healthcare workers in Africa.**

# Funnel plot

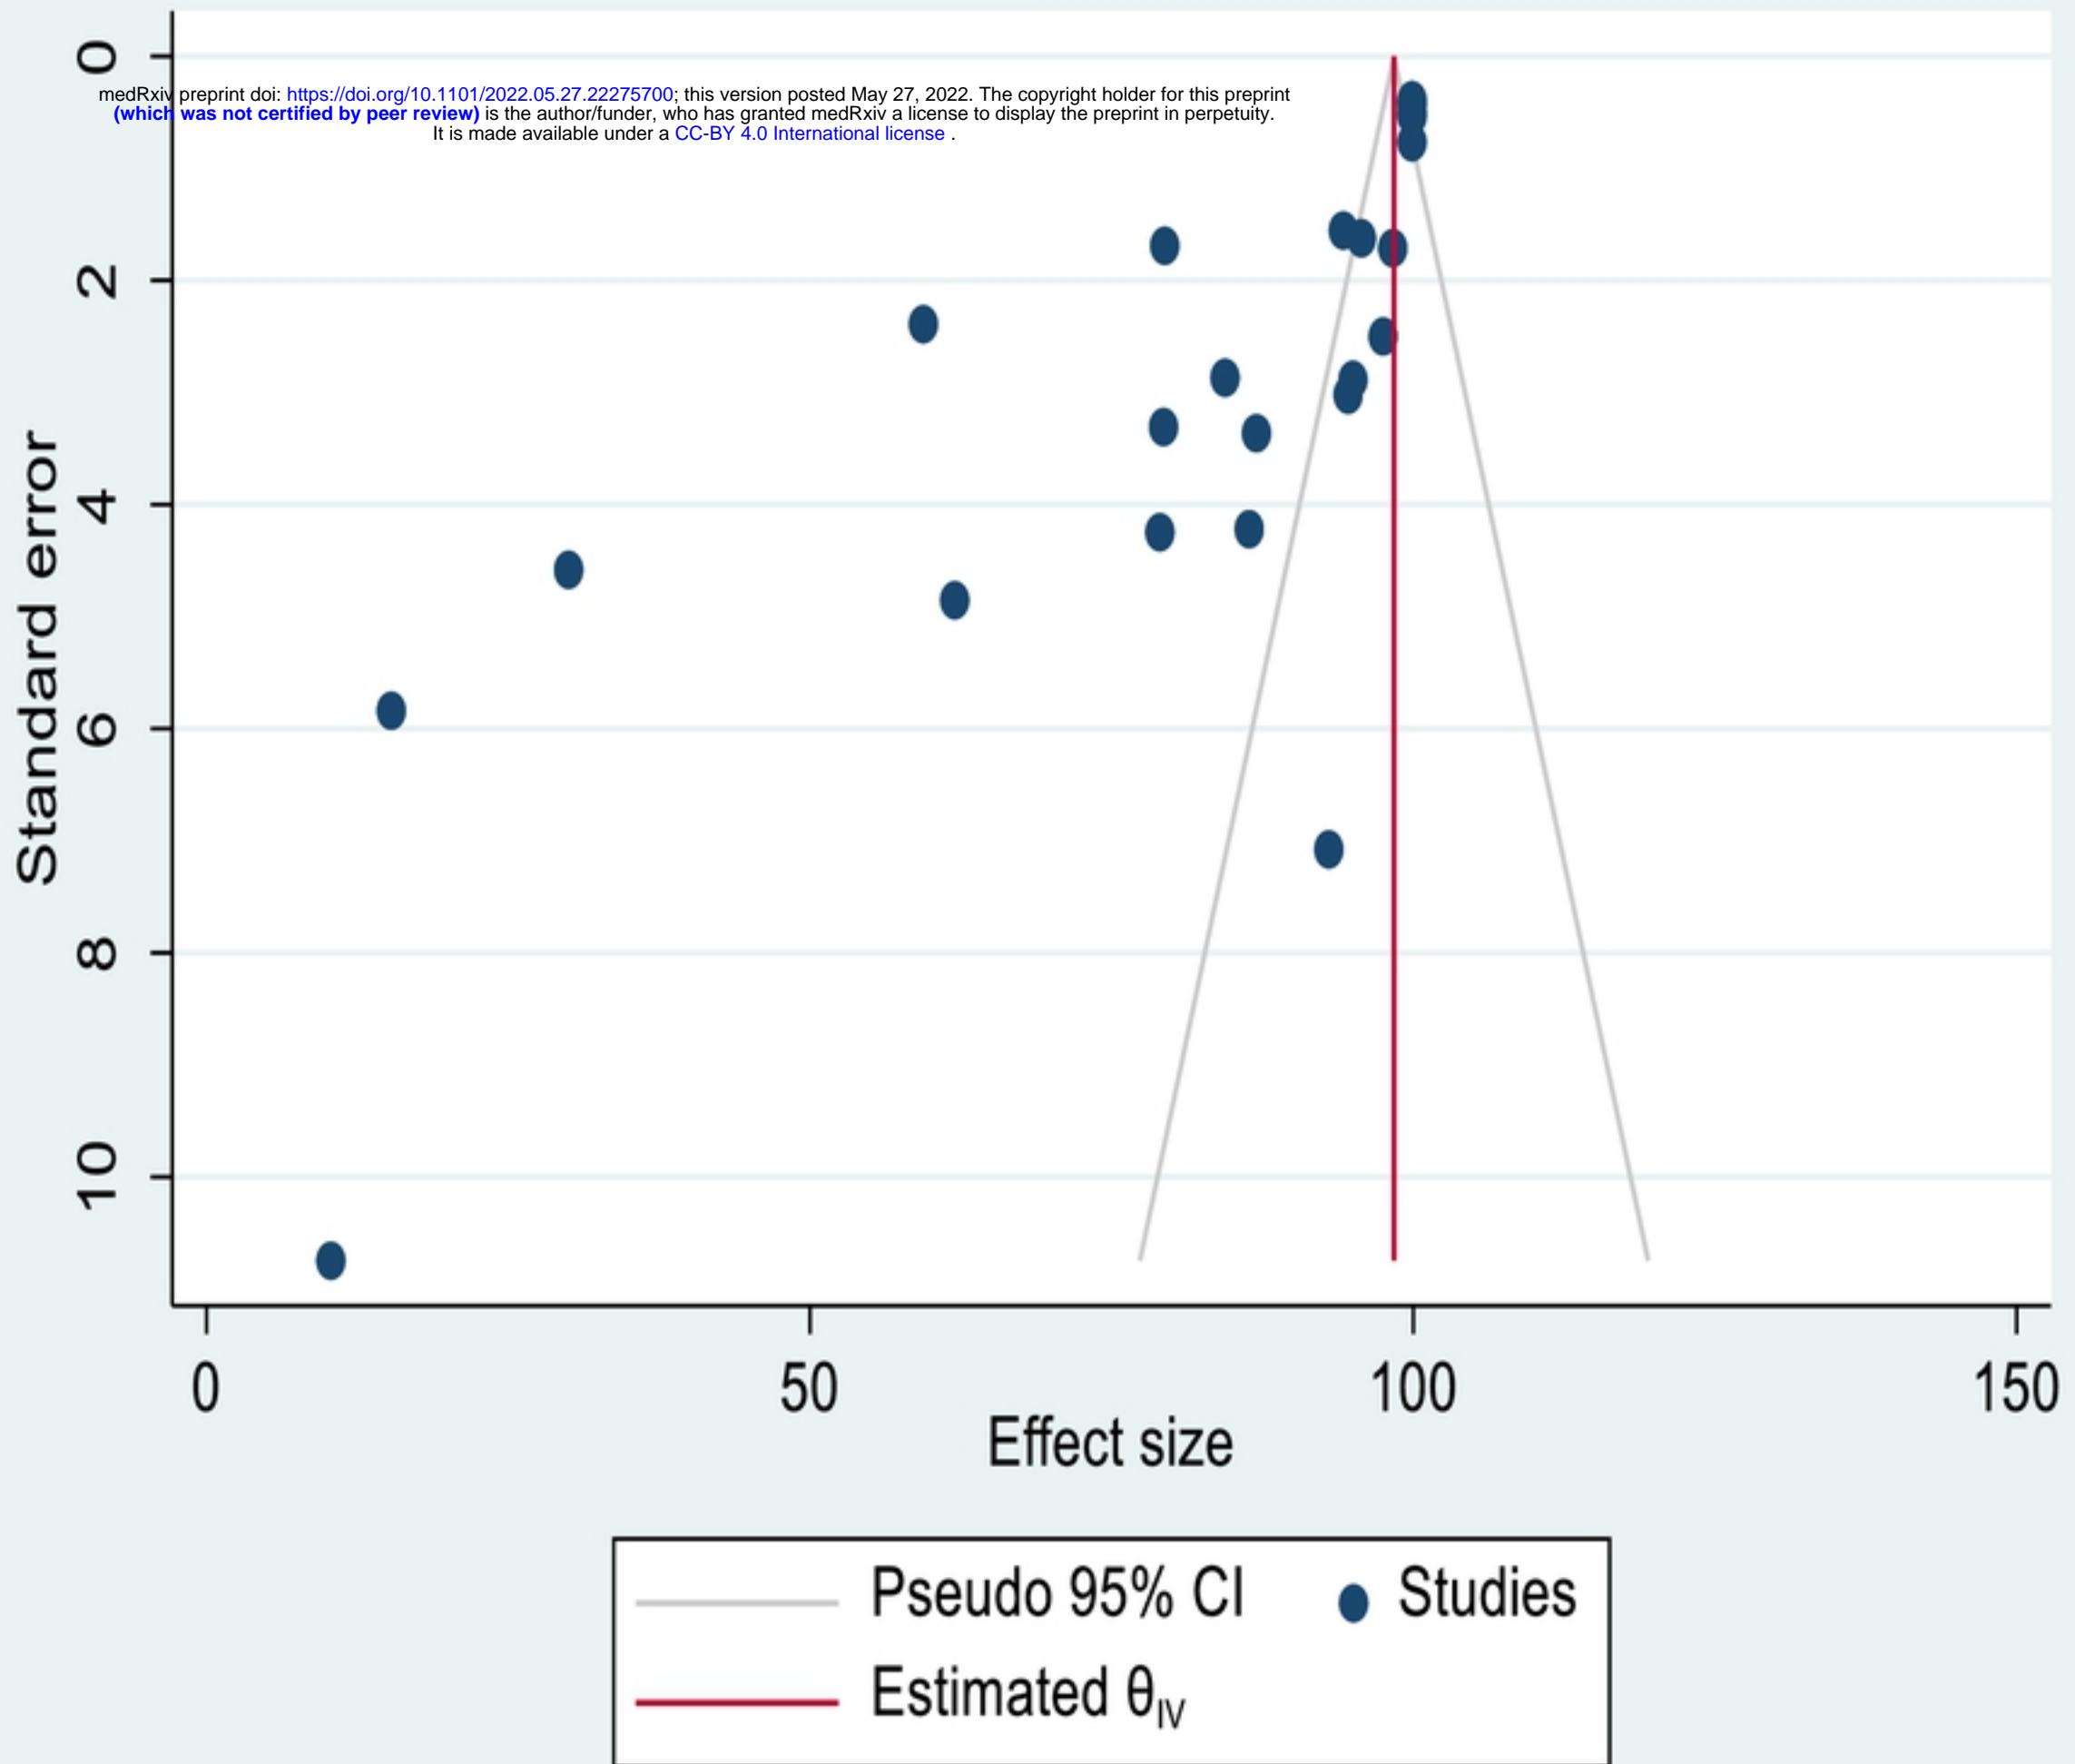

Figure 7: Funnel plot with 95% confidence limits of the pooled bacterial contamination rate of mobile phones used by healthcare workers in Africa.



# Funnel plot

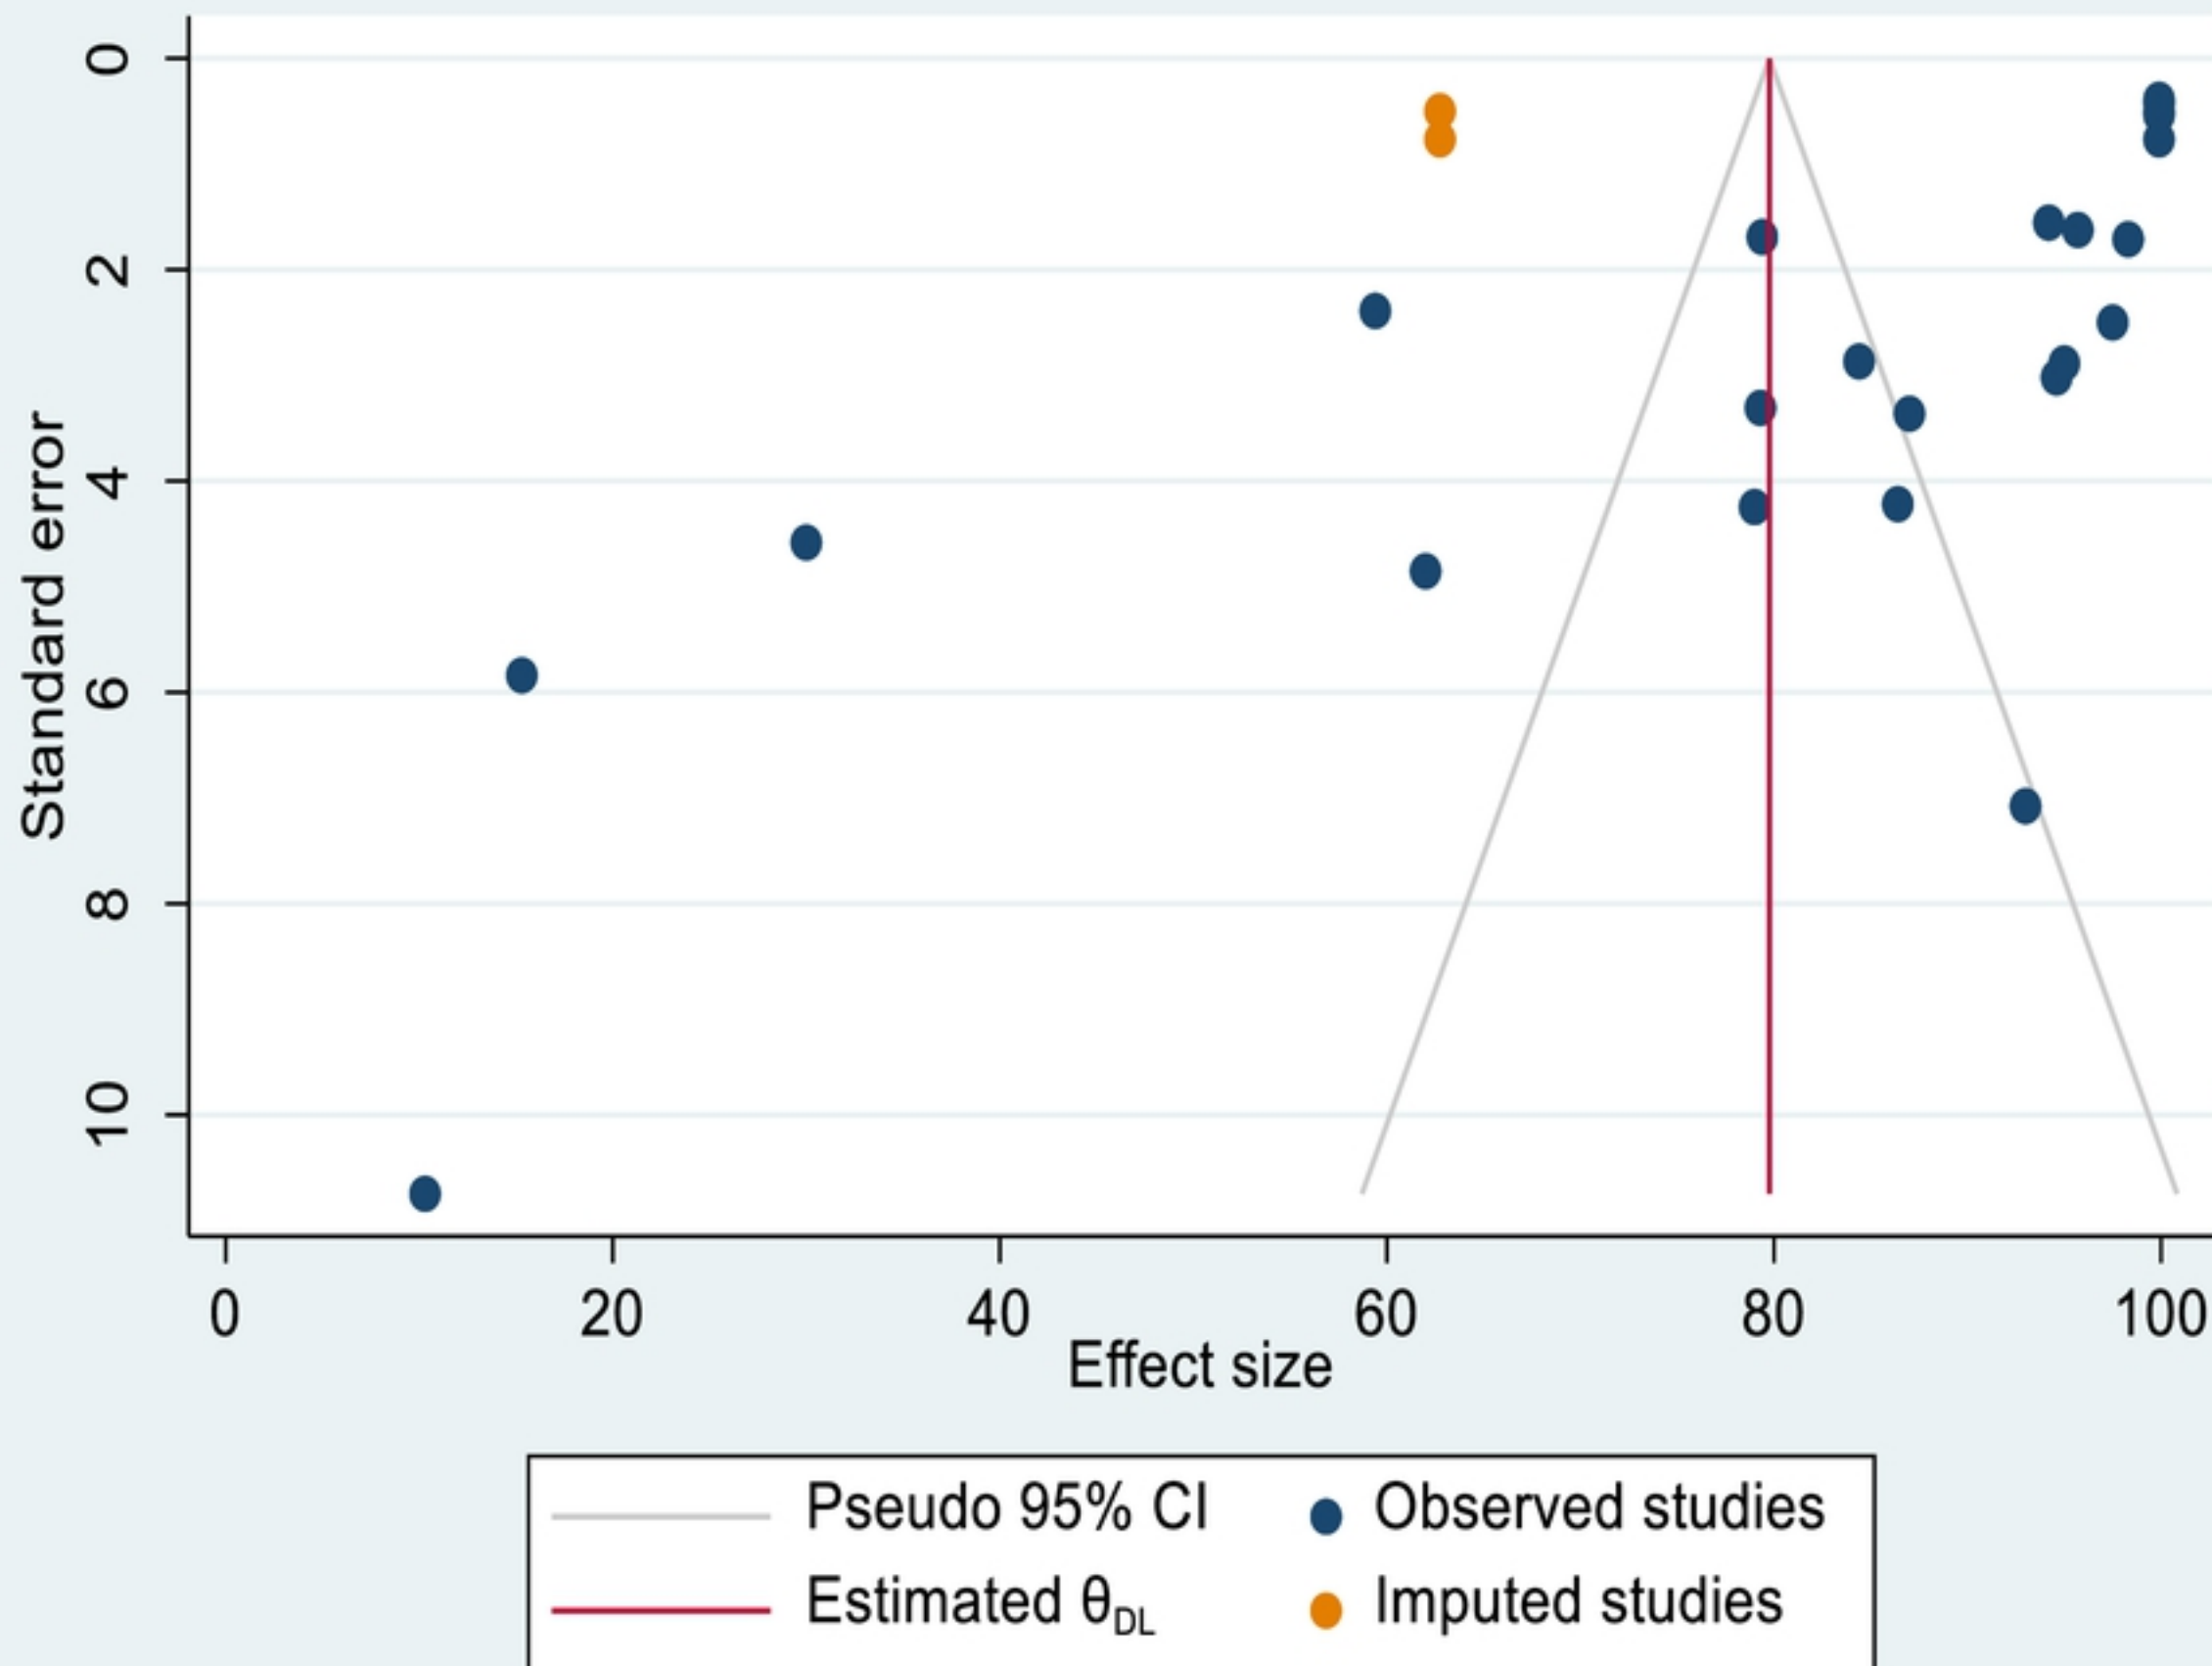

**Figure 8: Funnel plot trim fill analysis with 95% confidence limits of the pooled bacterial contamination rate of mobile phones used by healthcare workers in Africa.**
